# Supplementary material
Source: PubMed Central journal article supplement (PMC4978313)

Registrations. For every subjects from original FA maps, we show images registered to target in Oishi space then skeletonized.

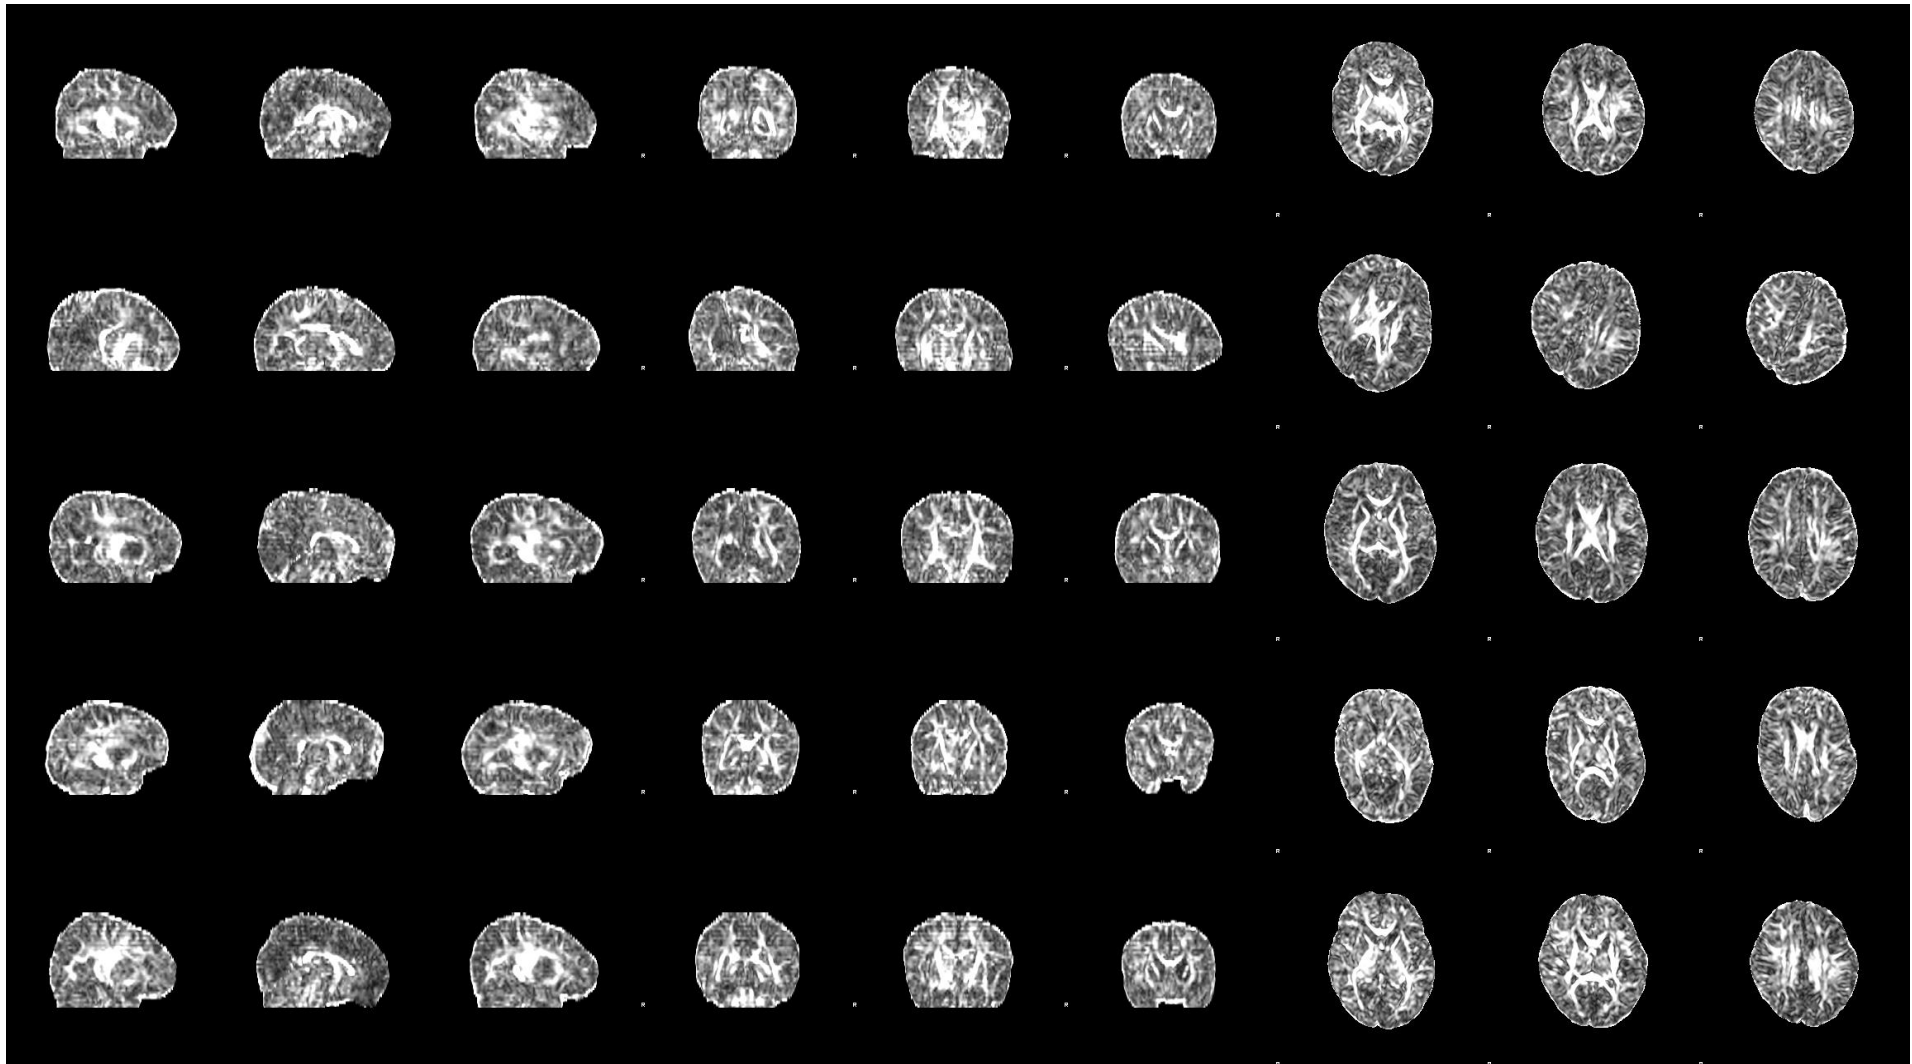

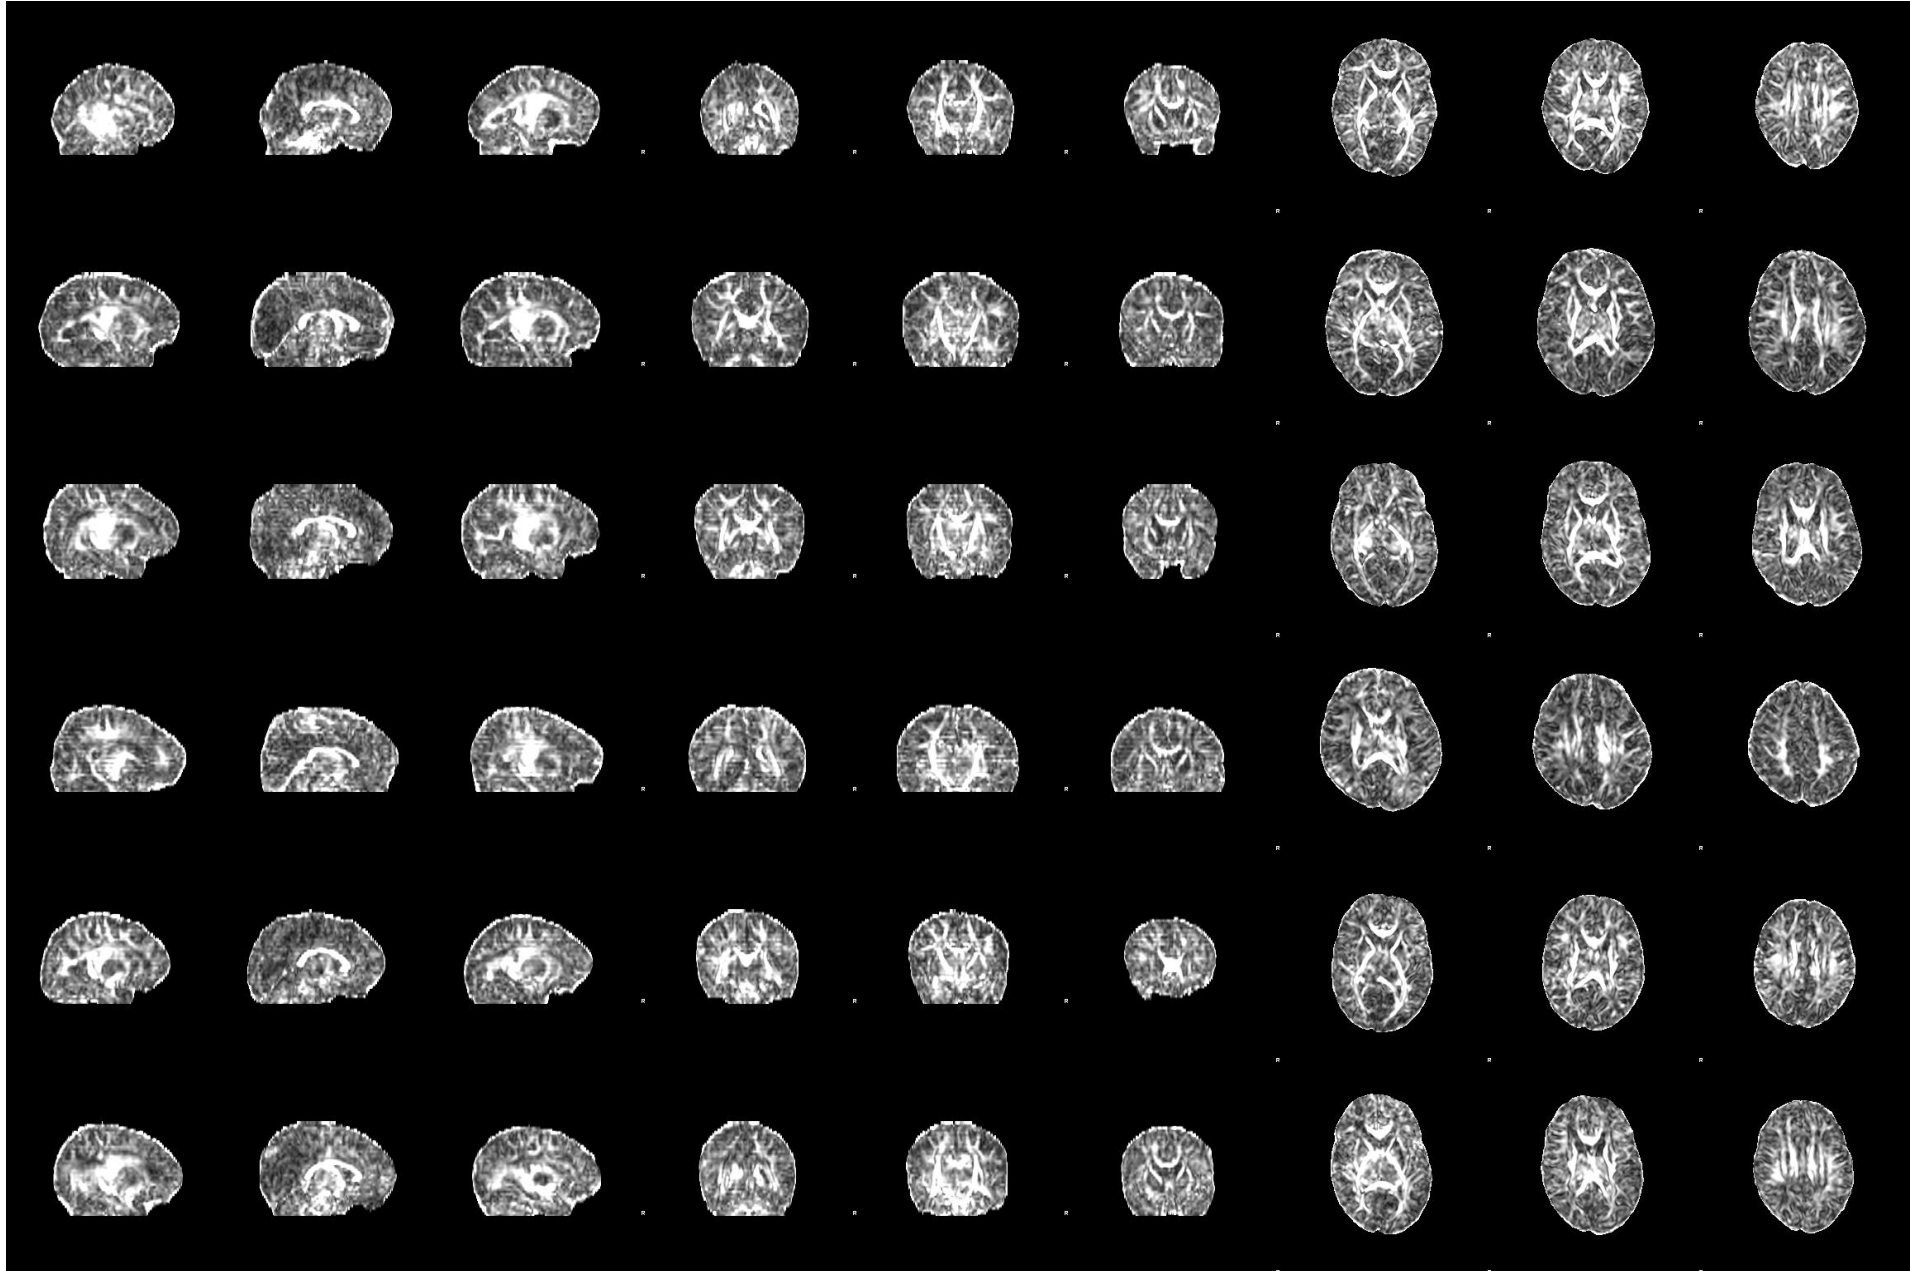

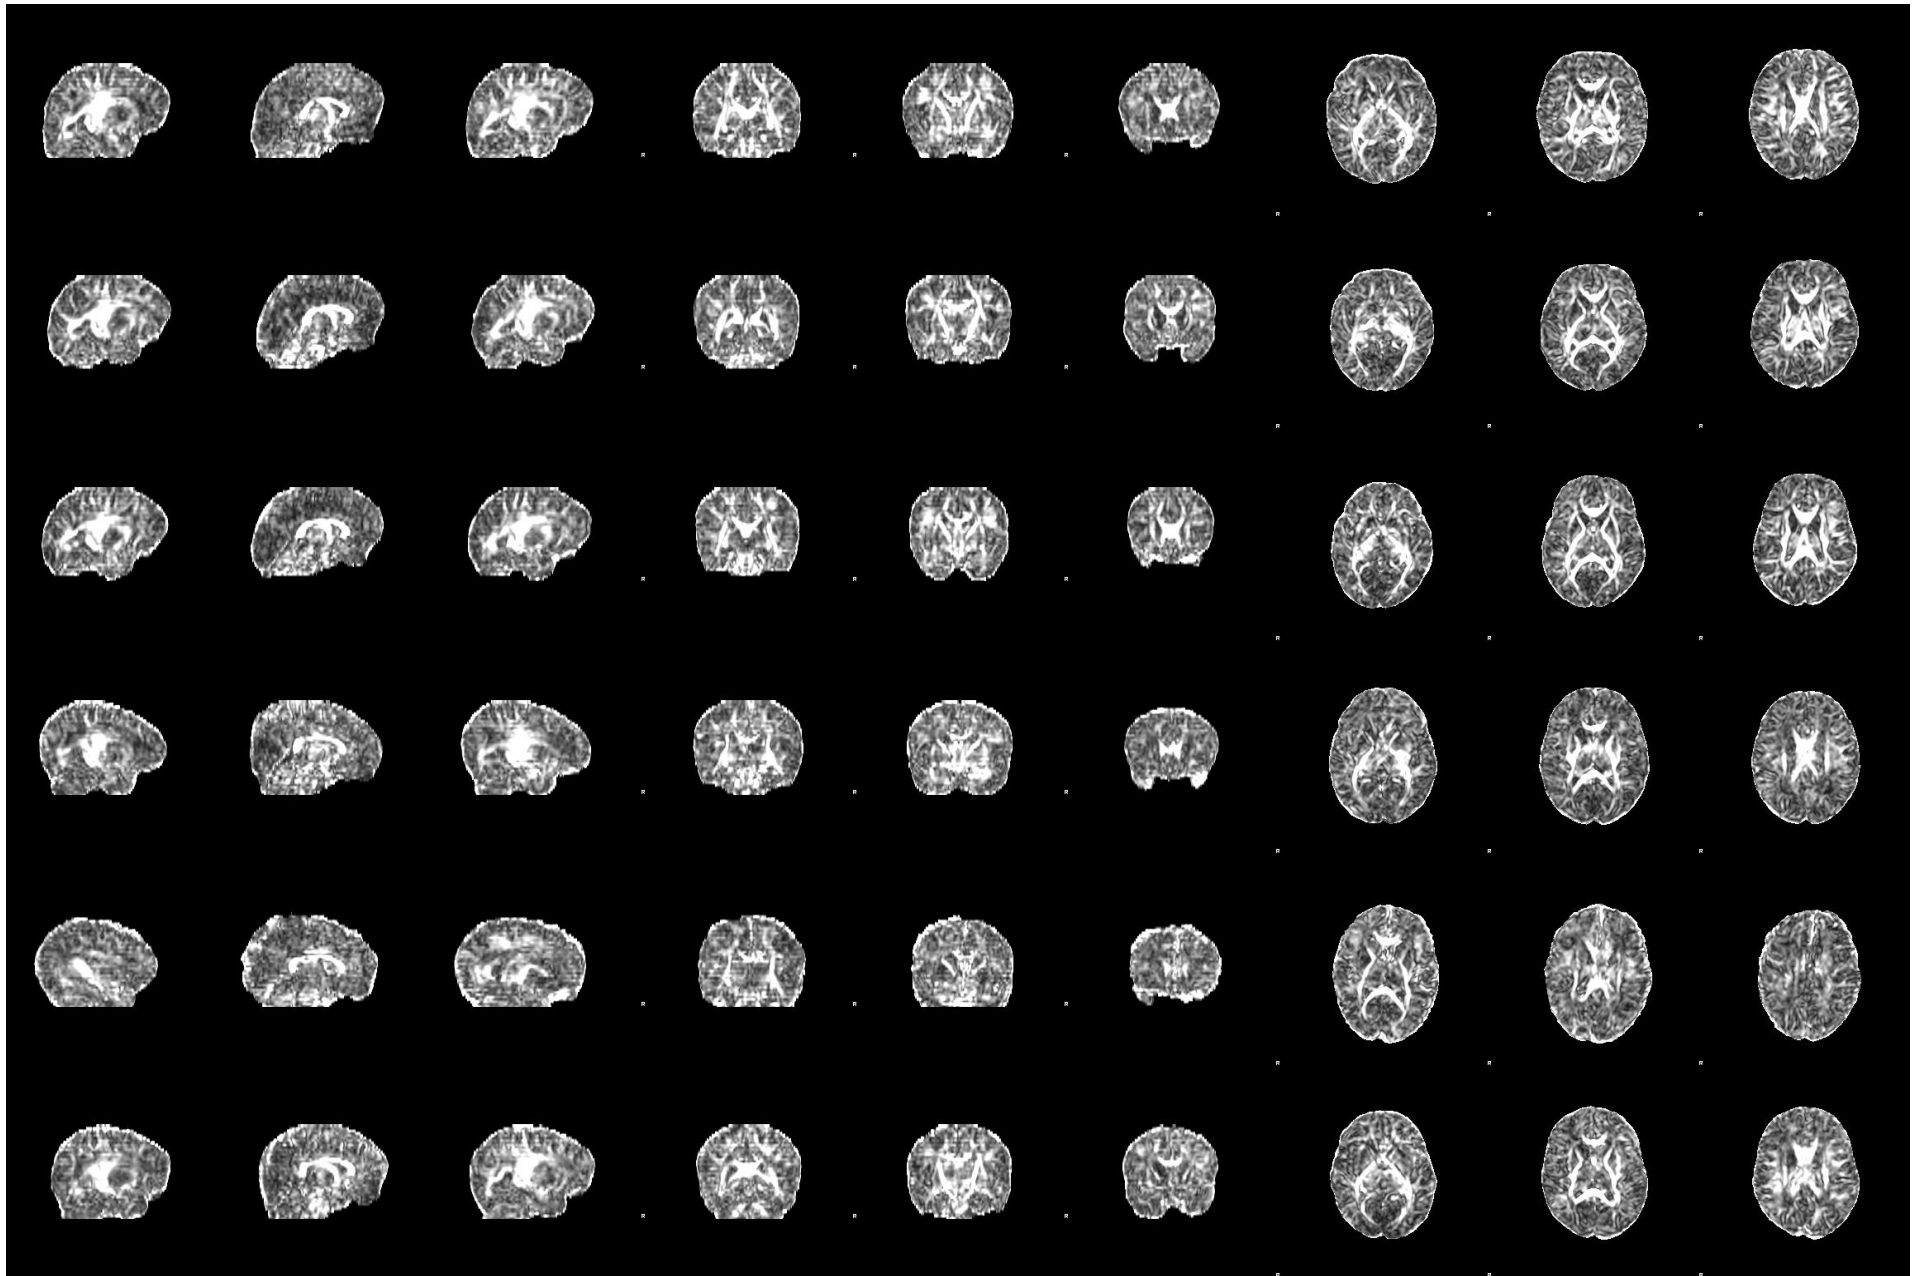

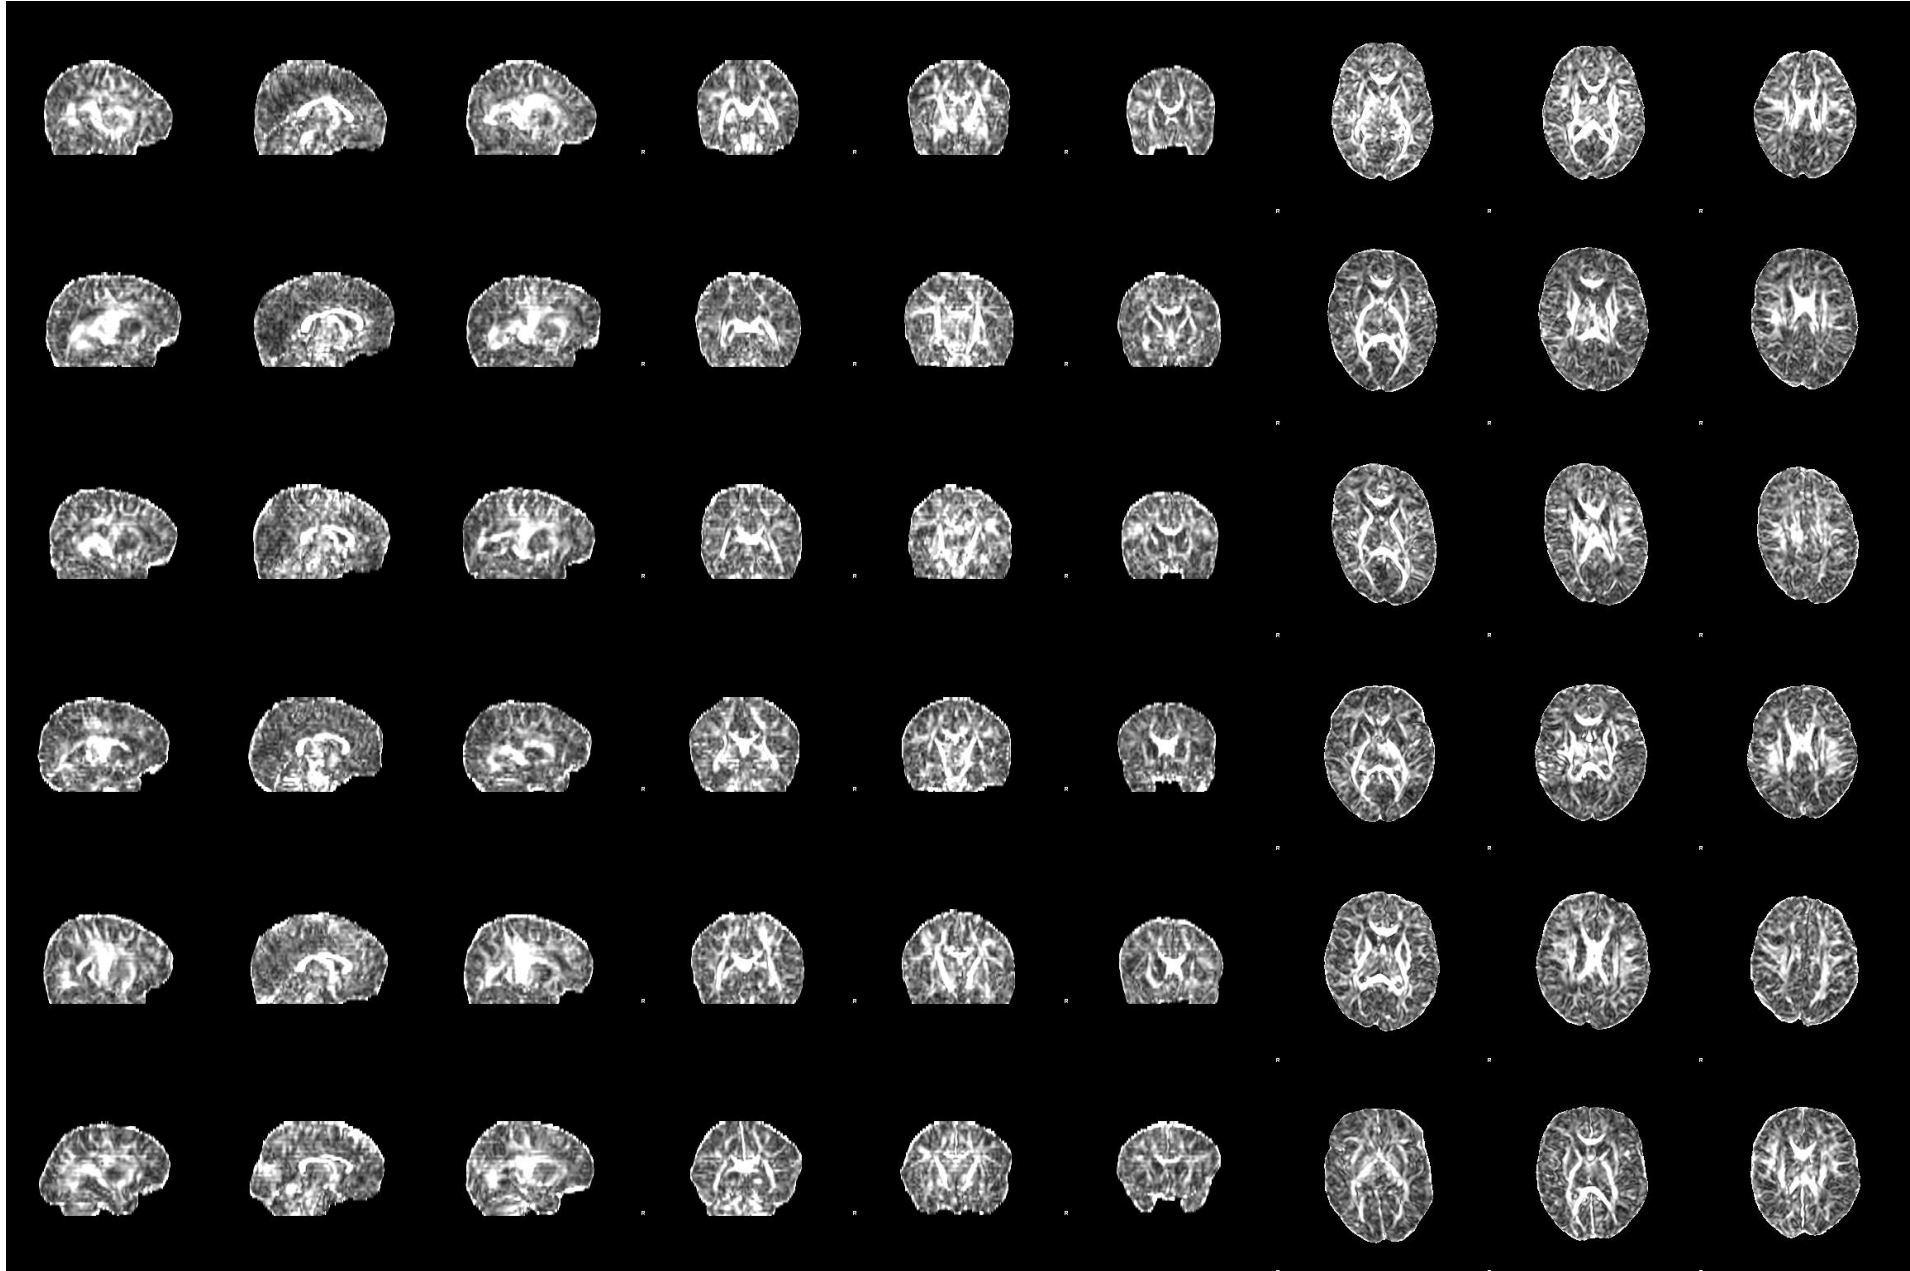

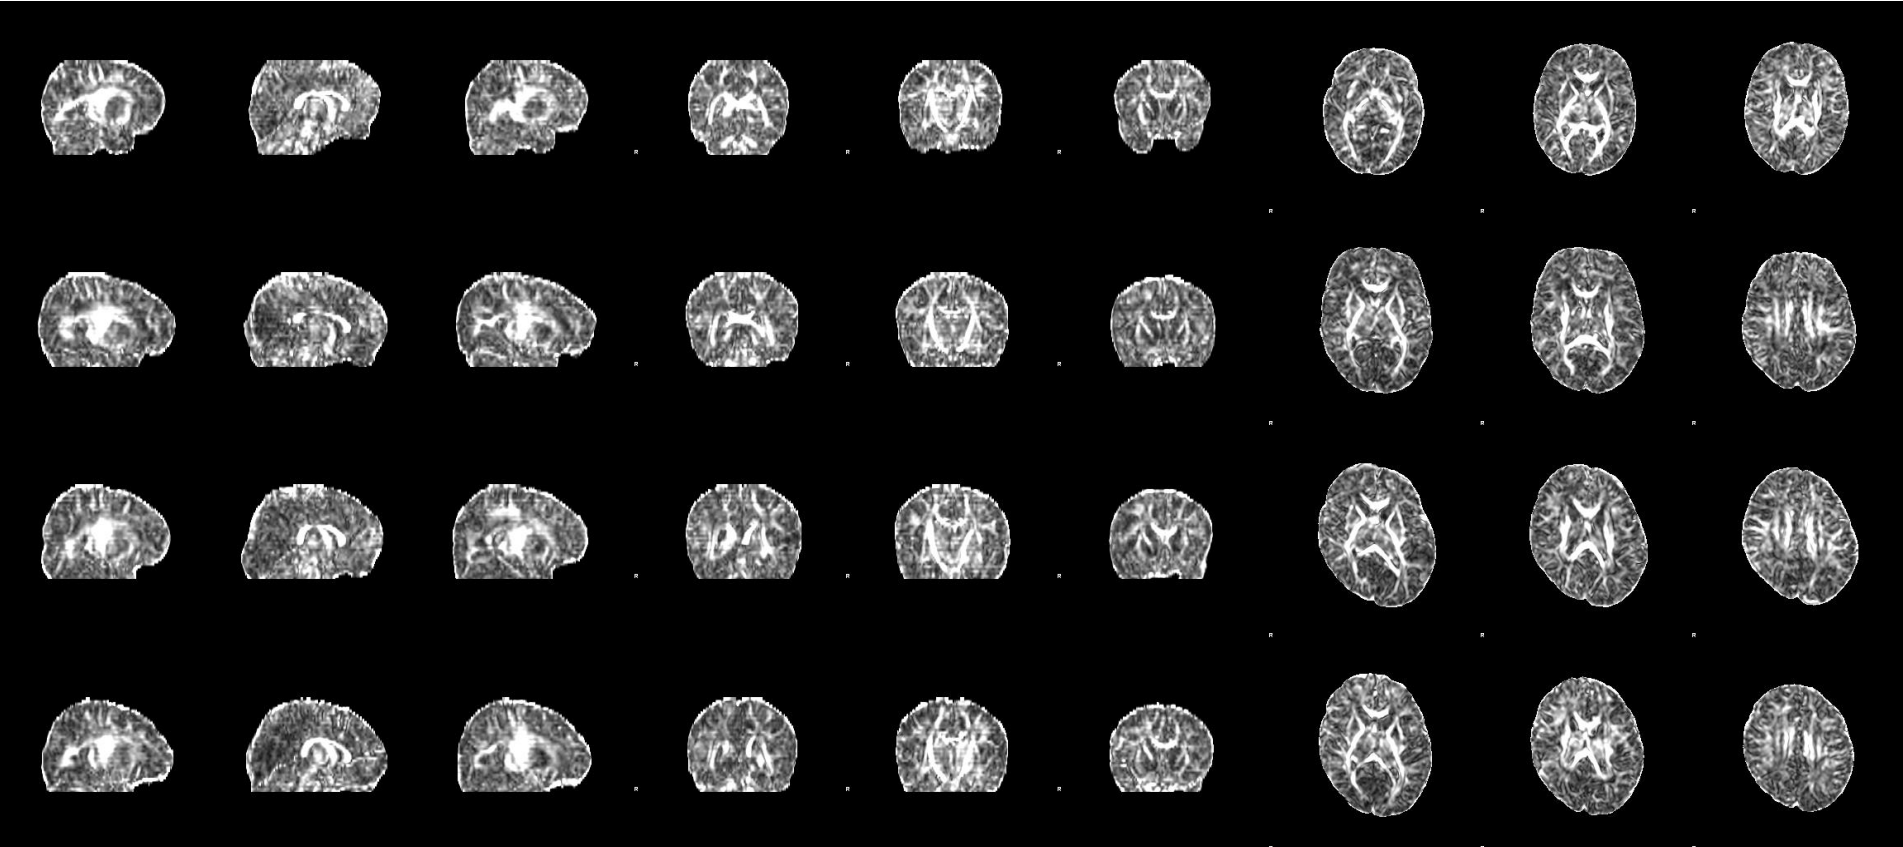

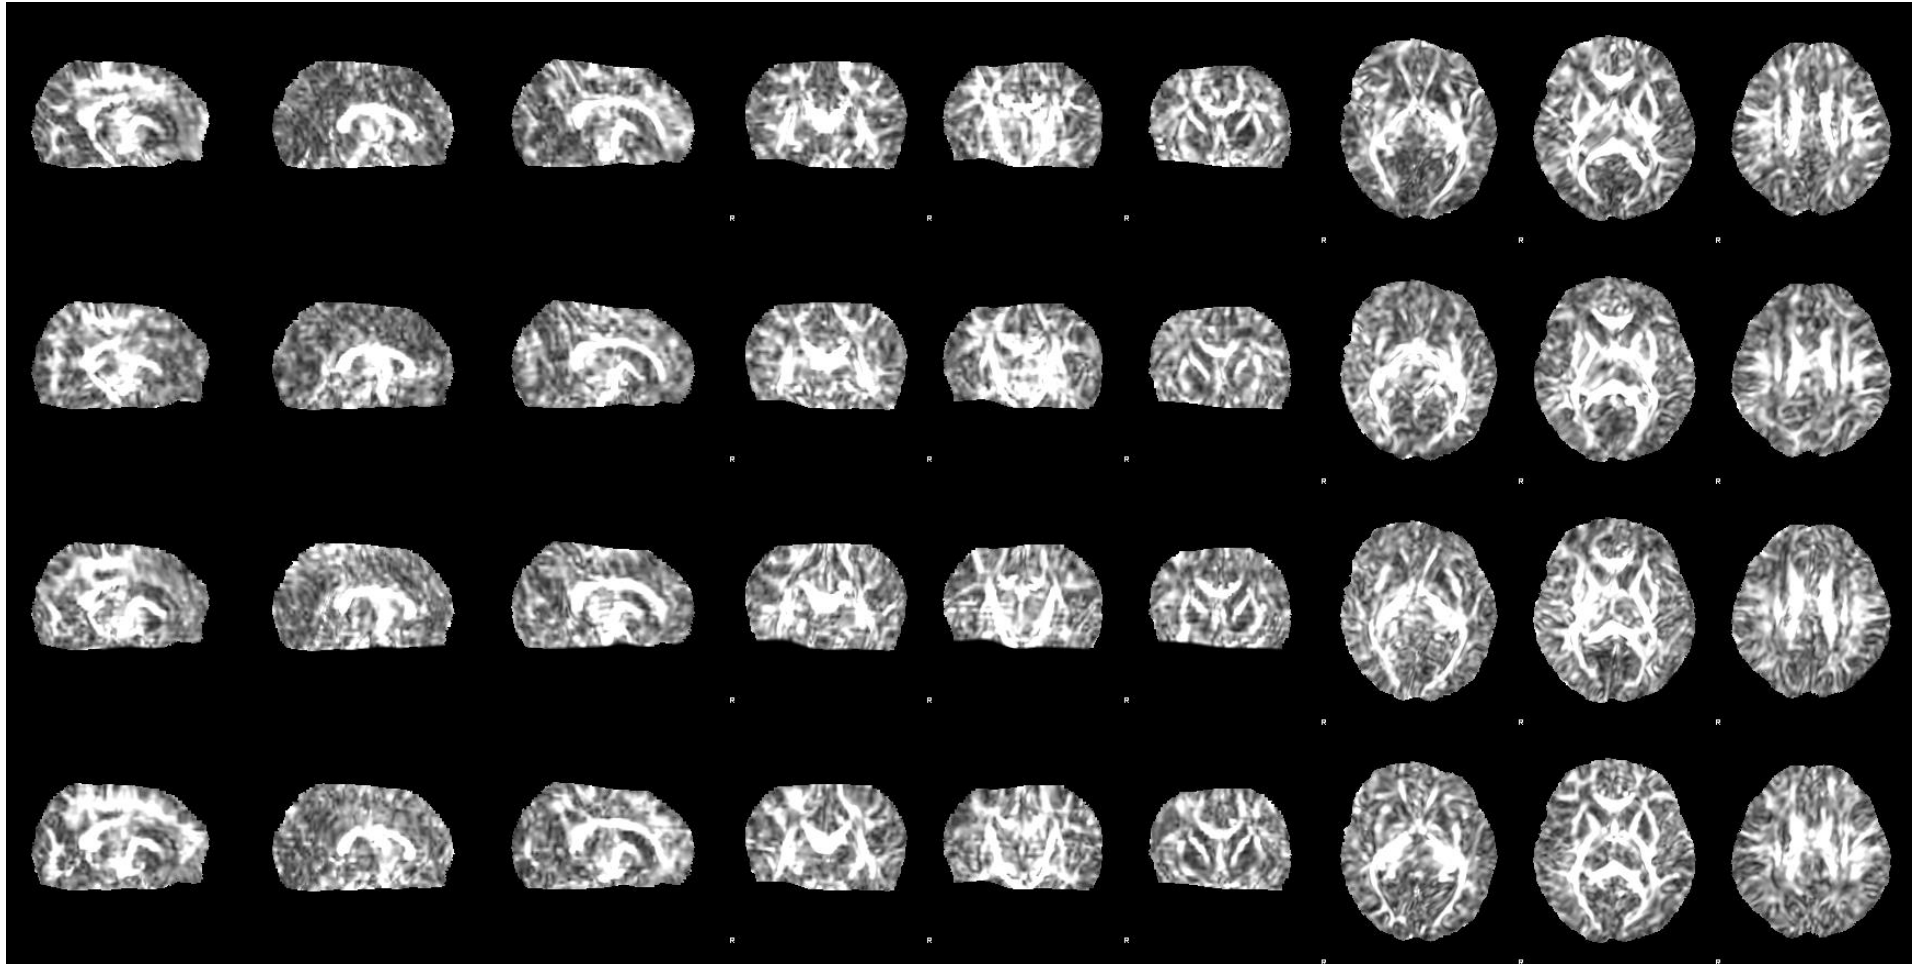

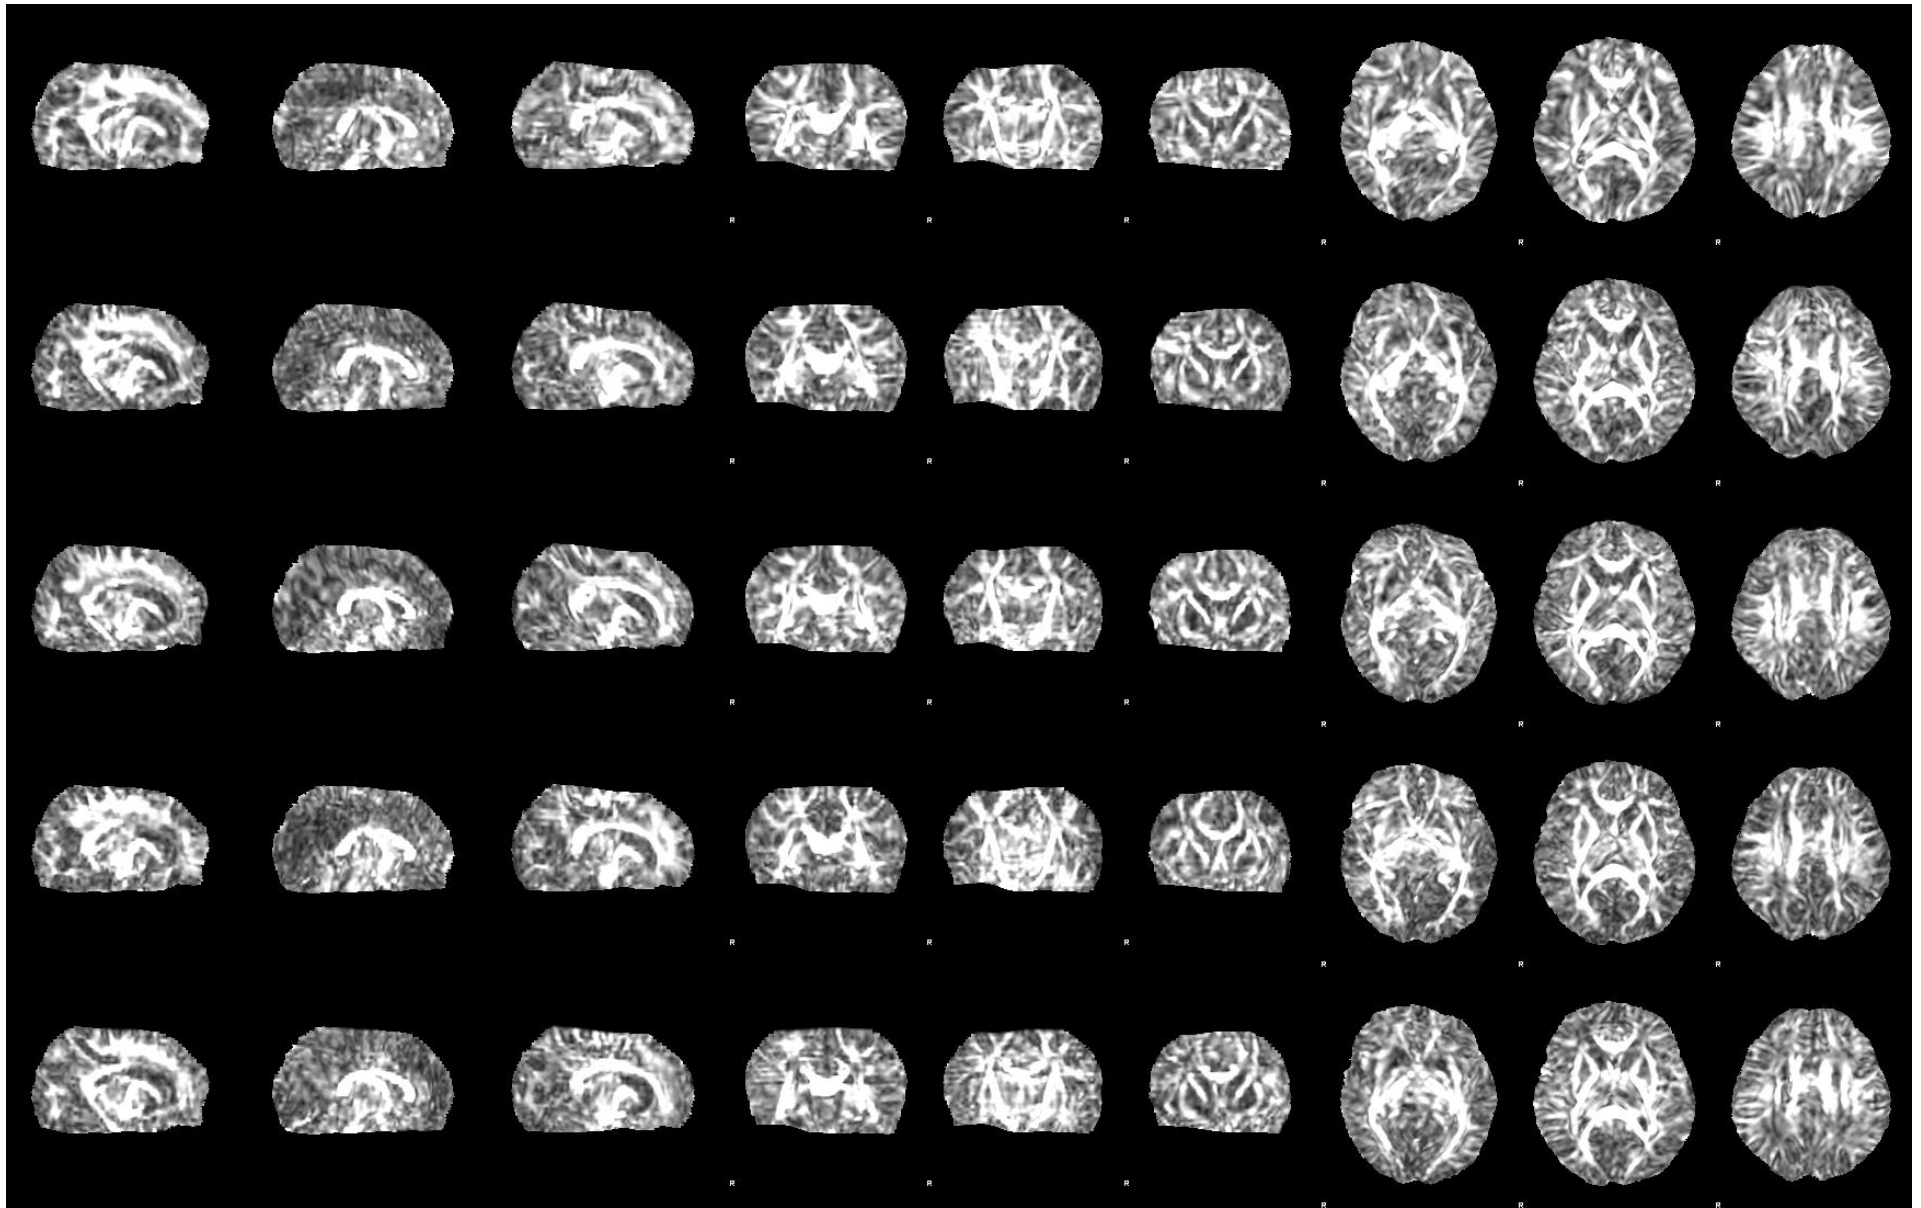

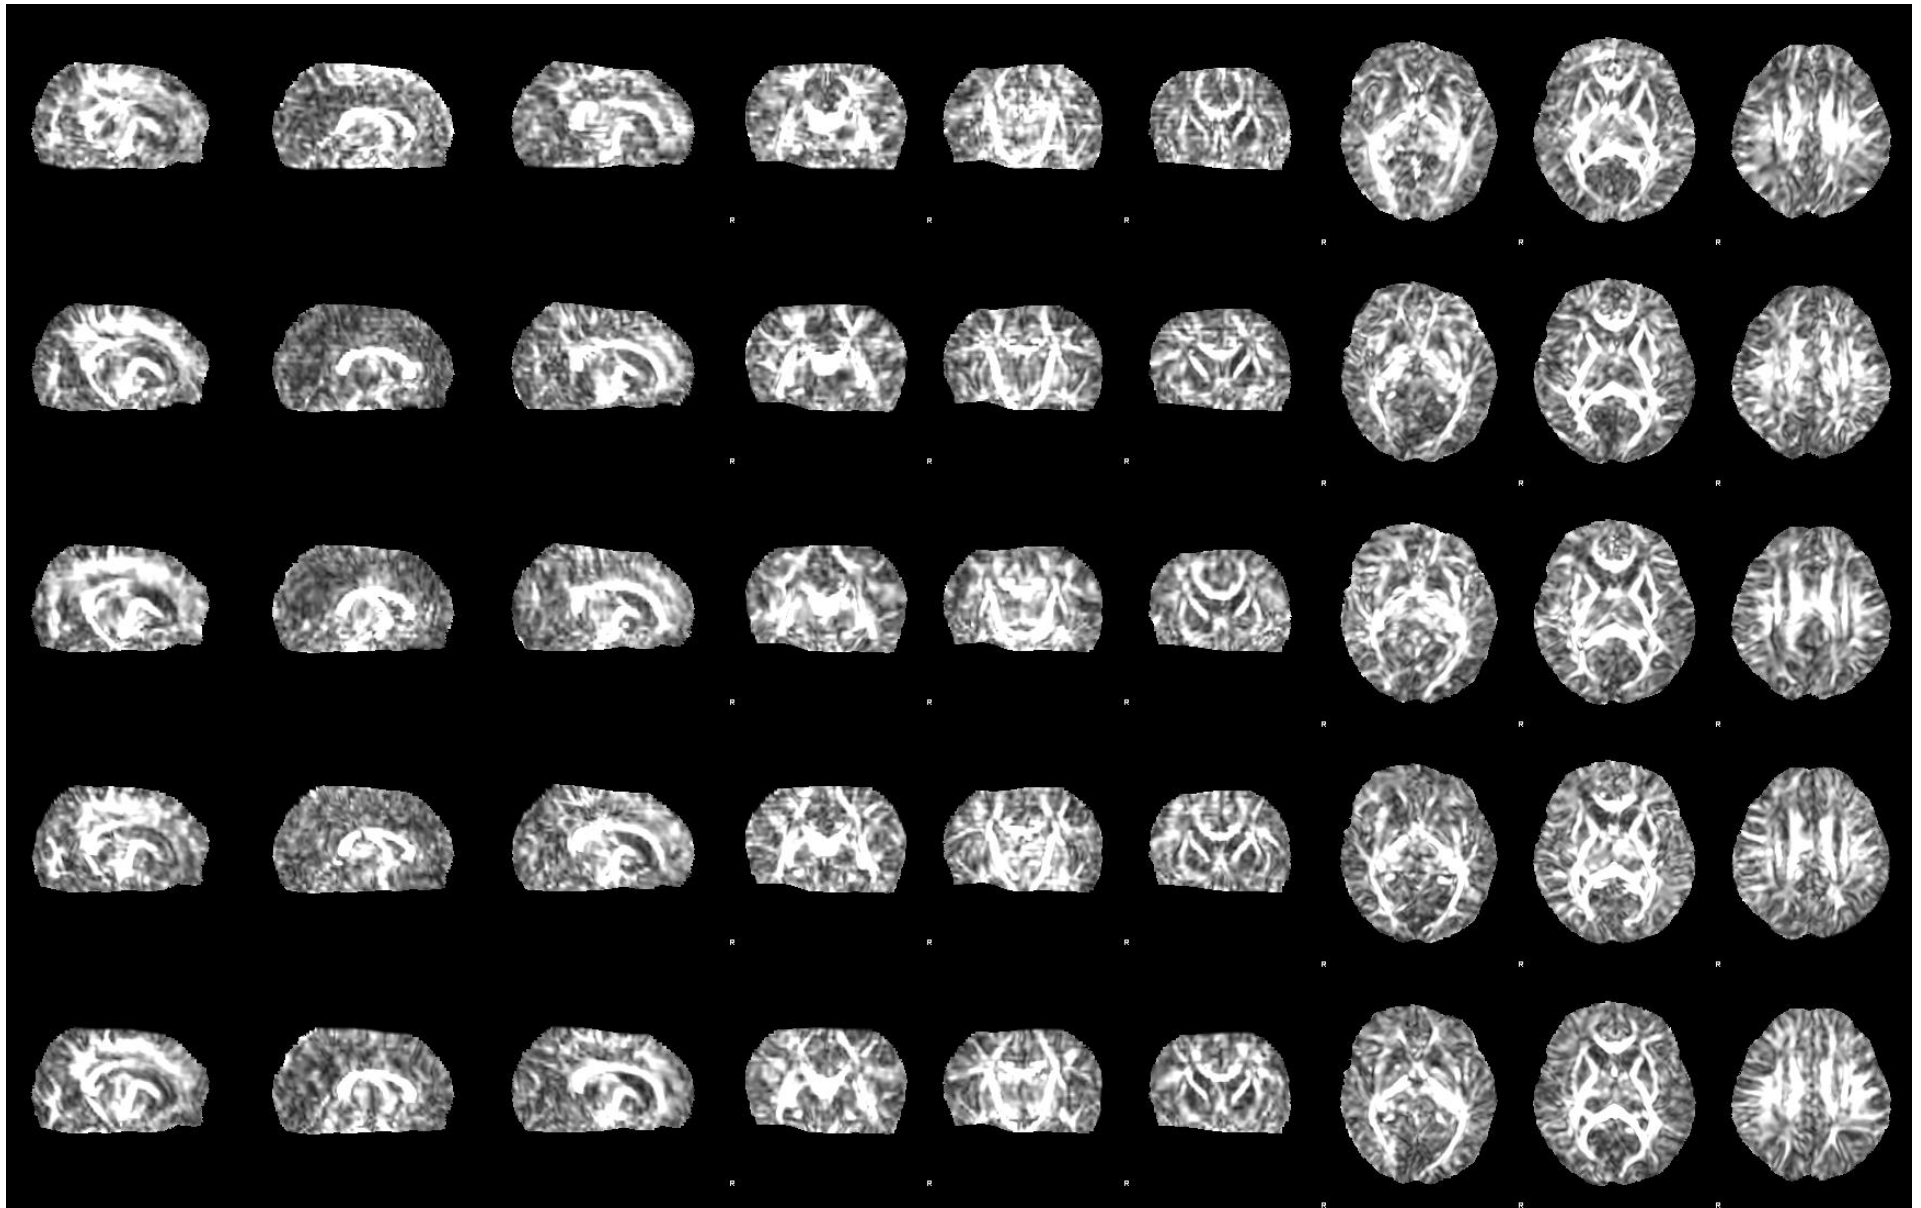



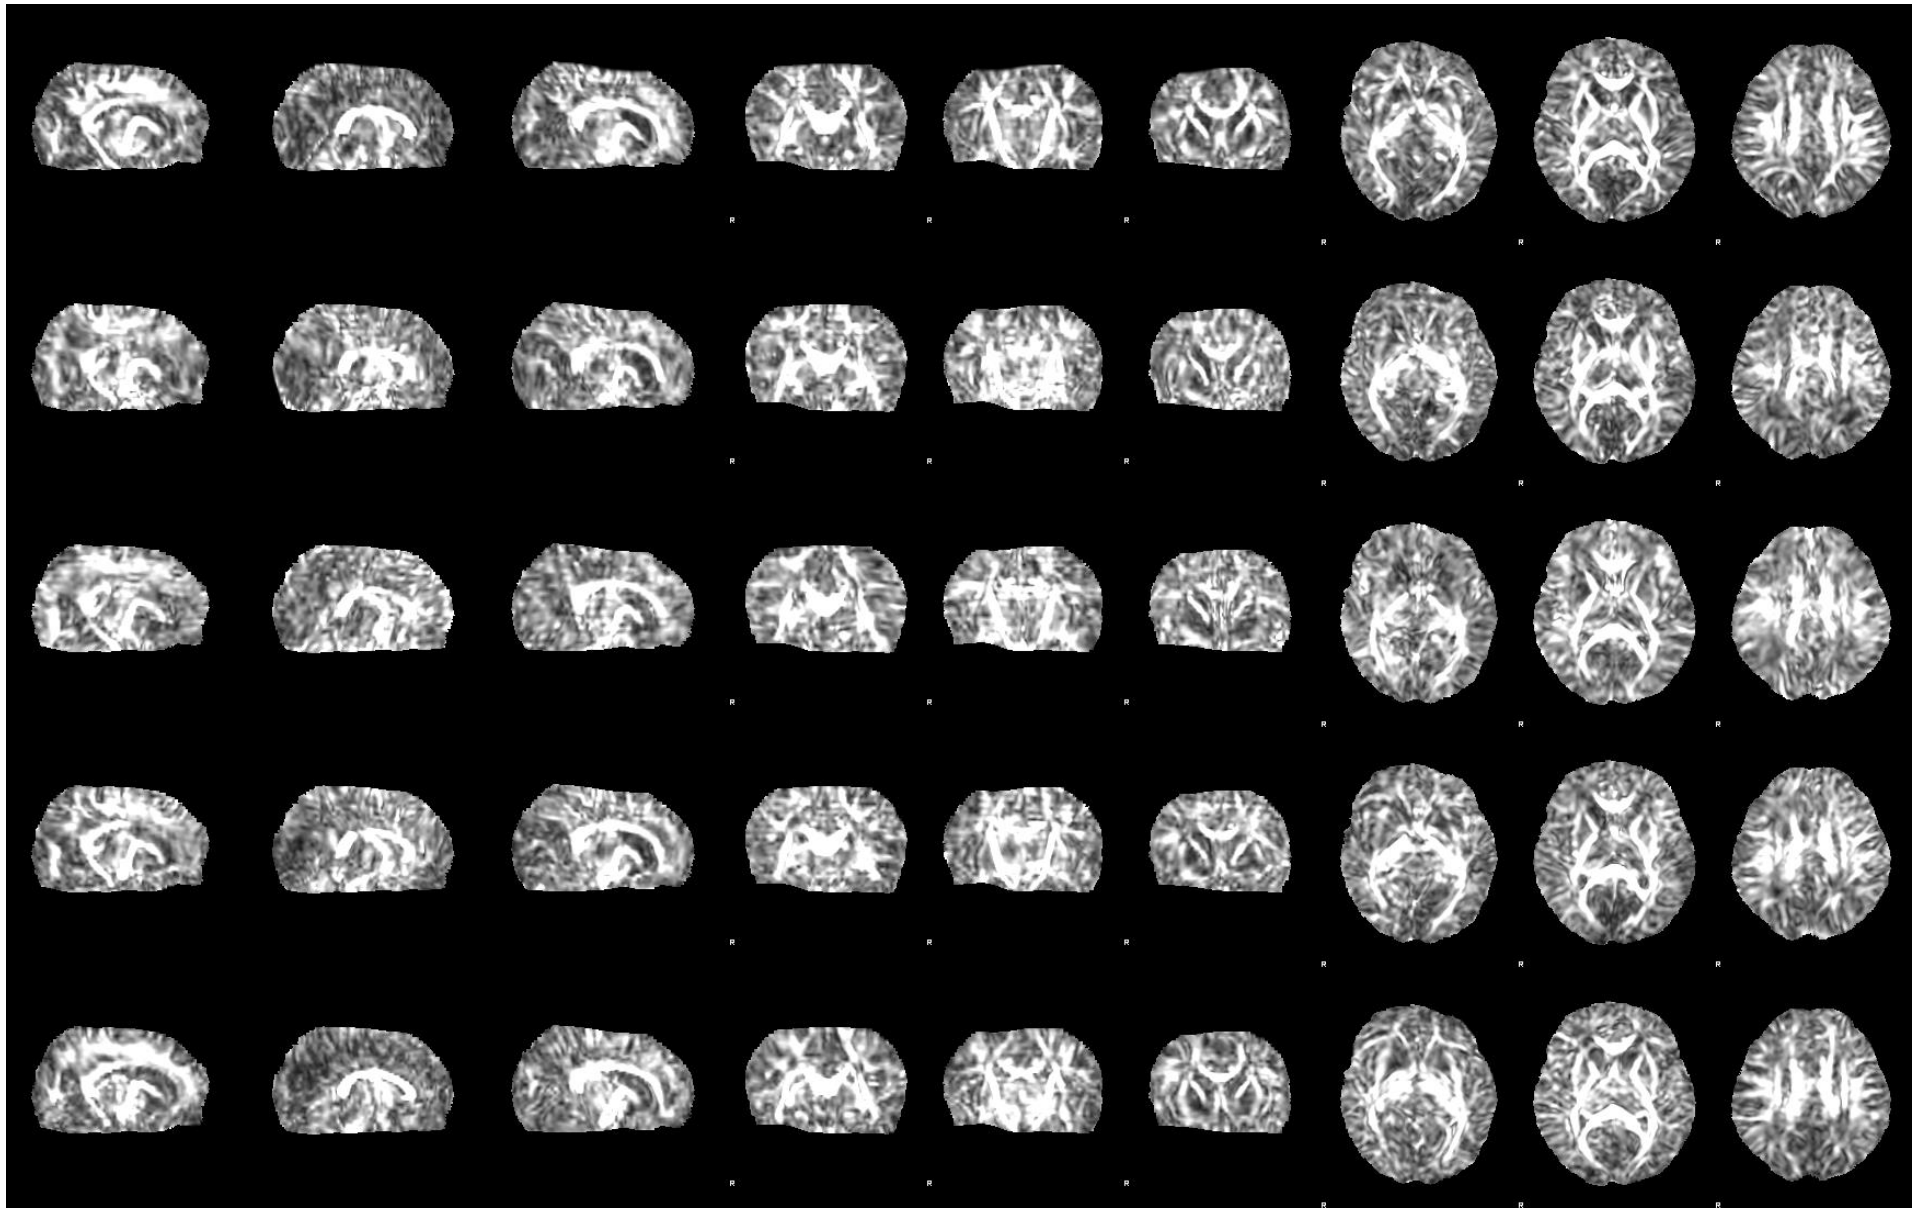

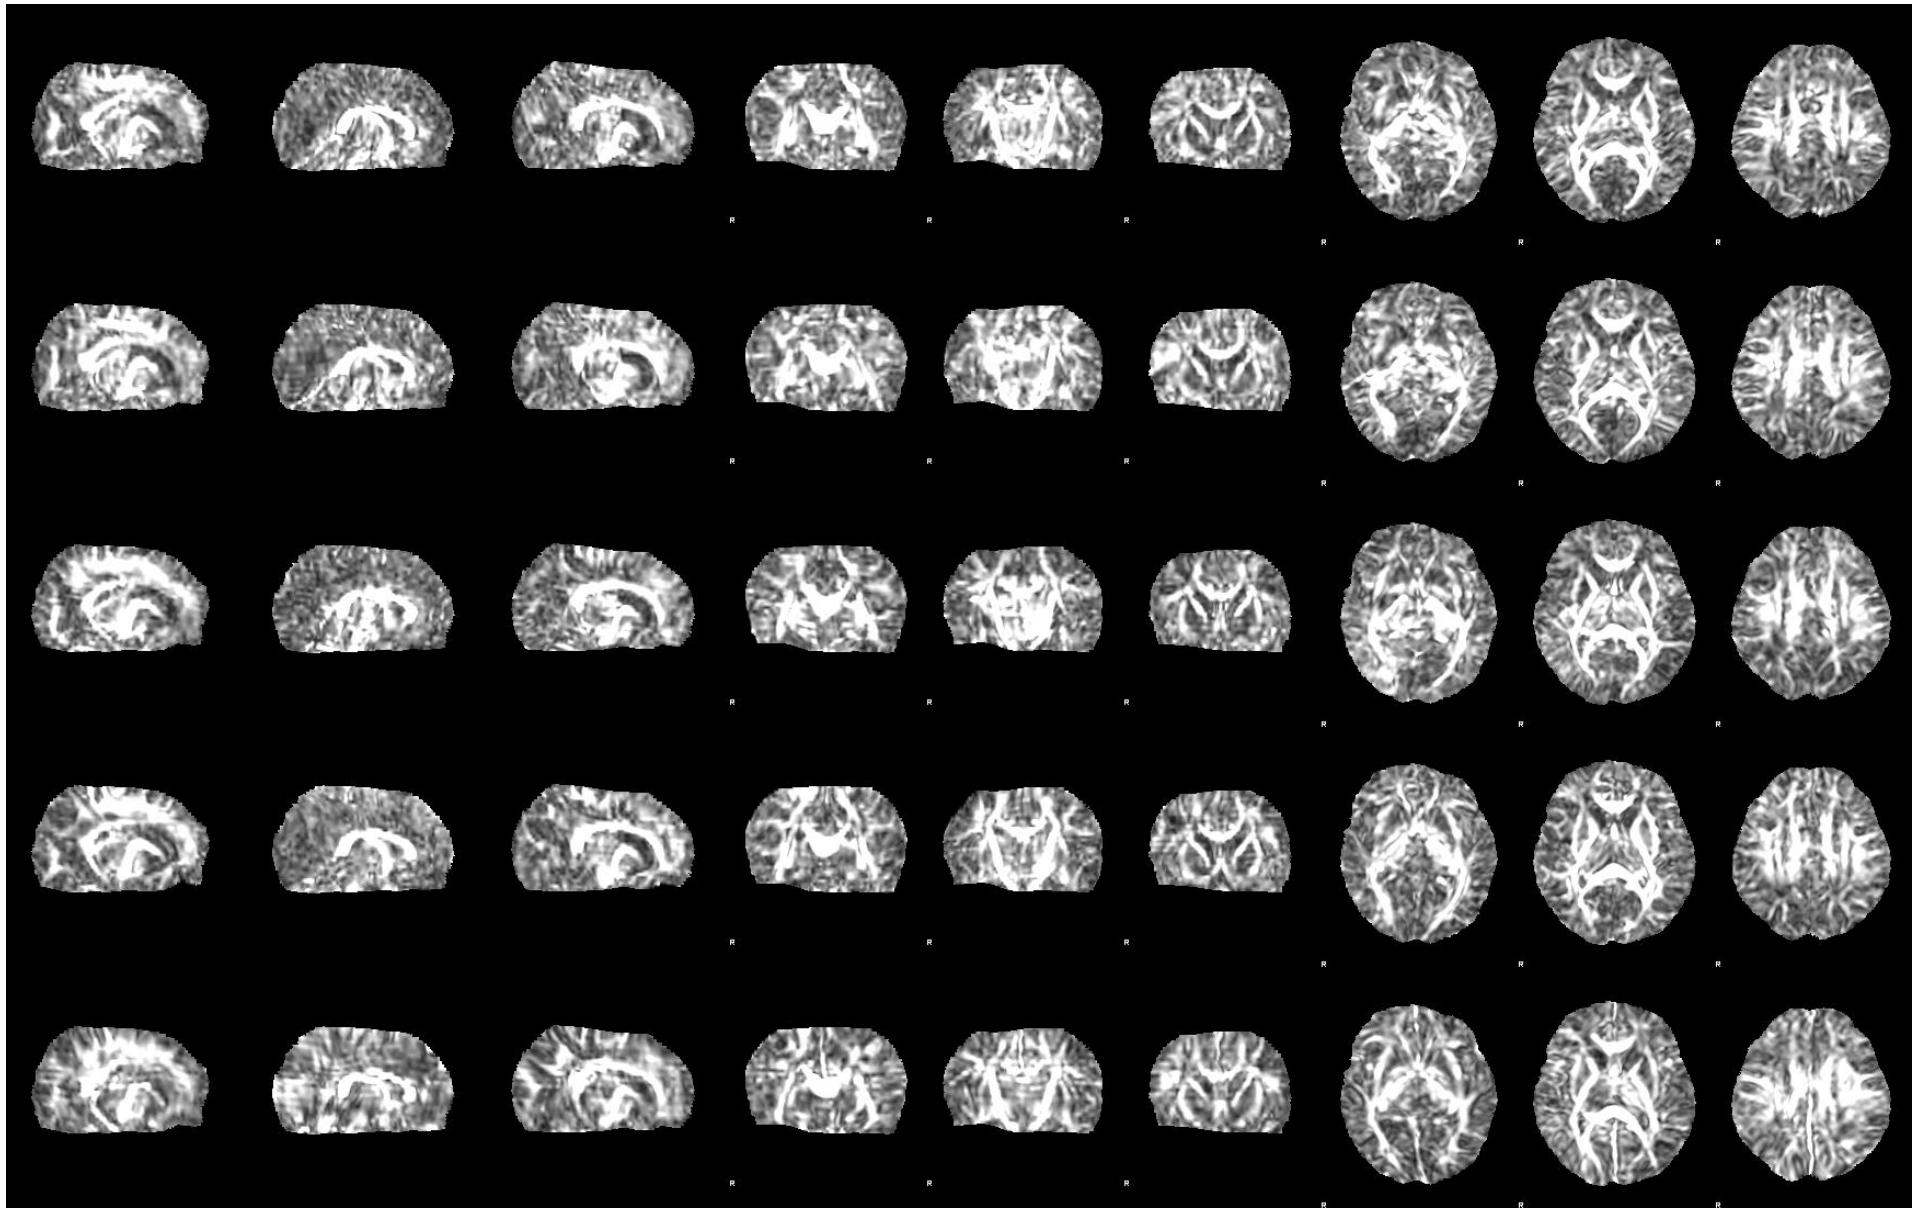

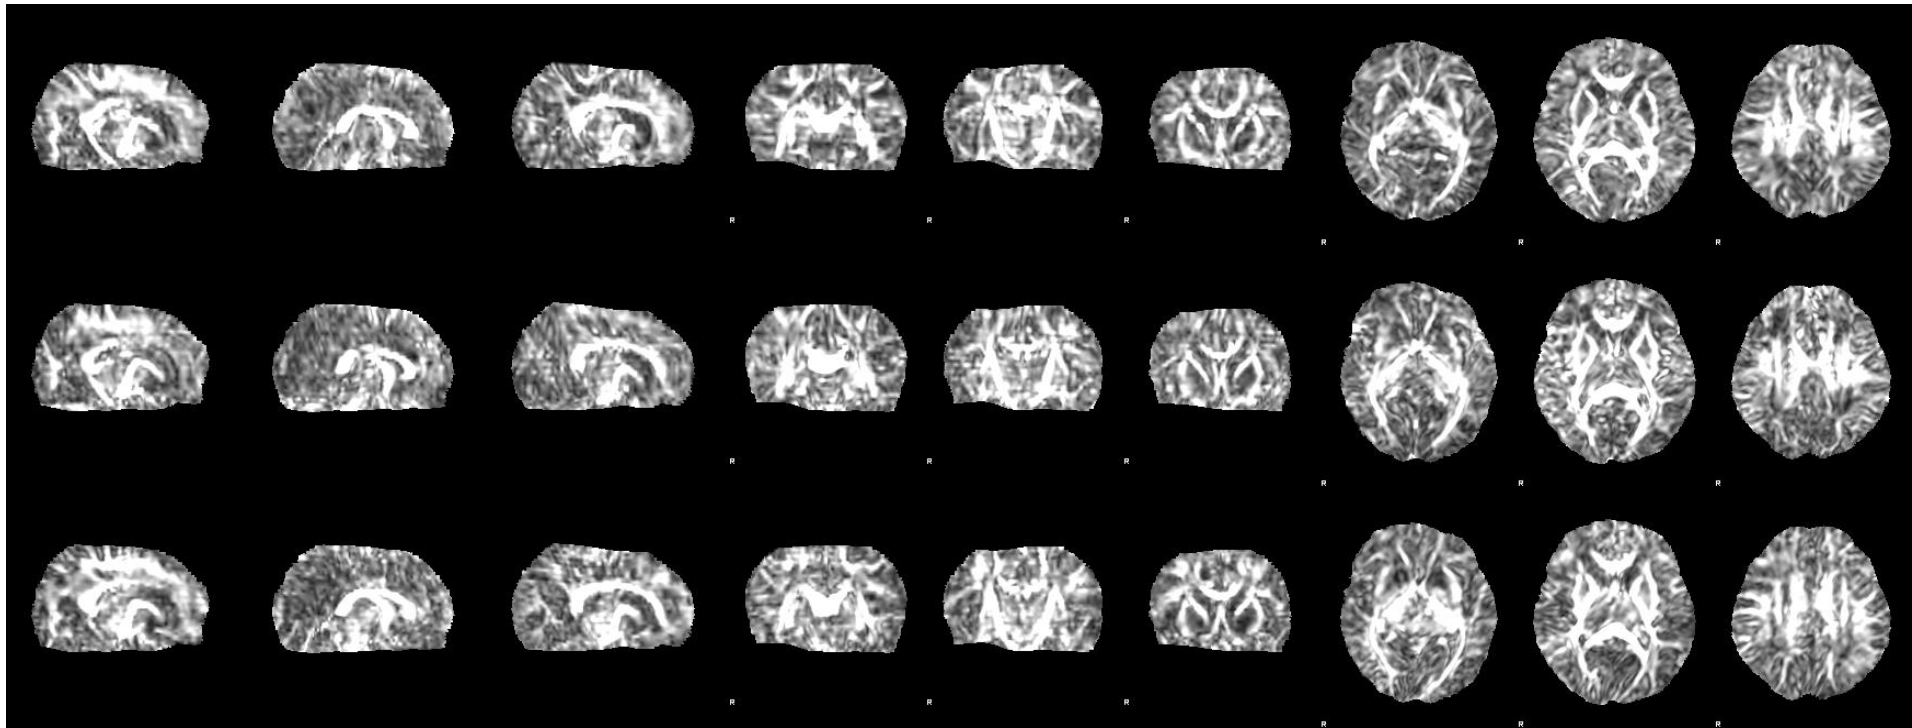

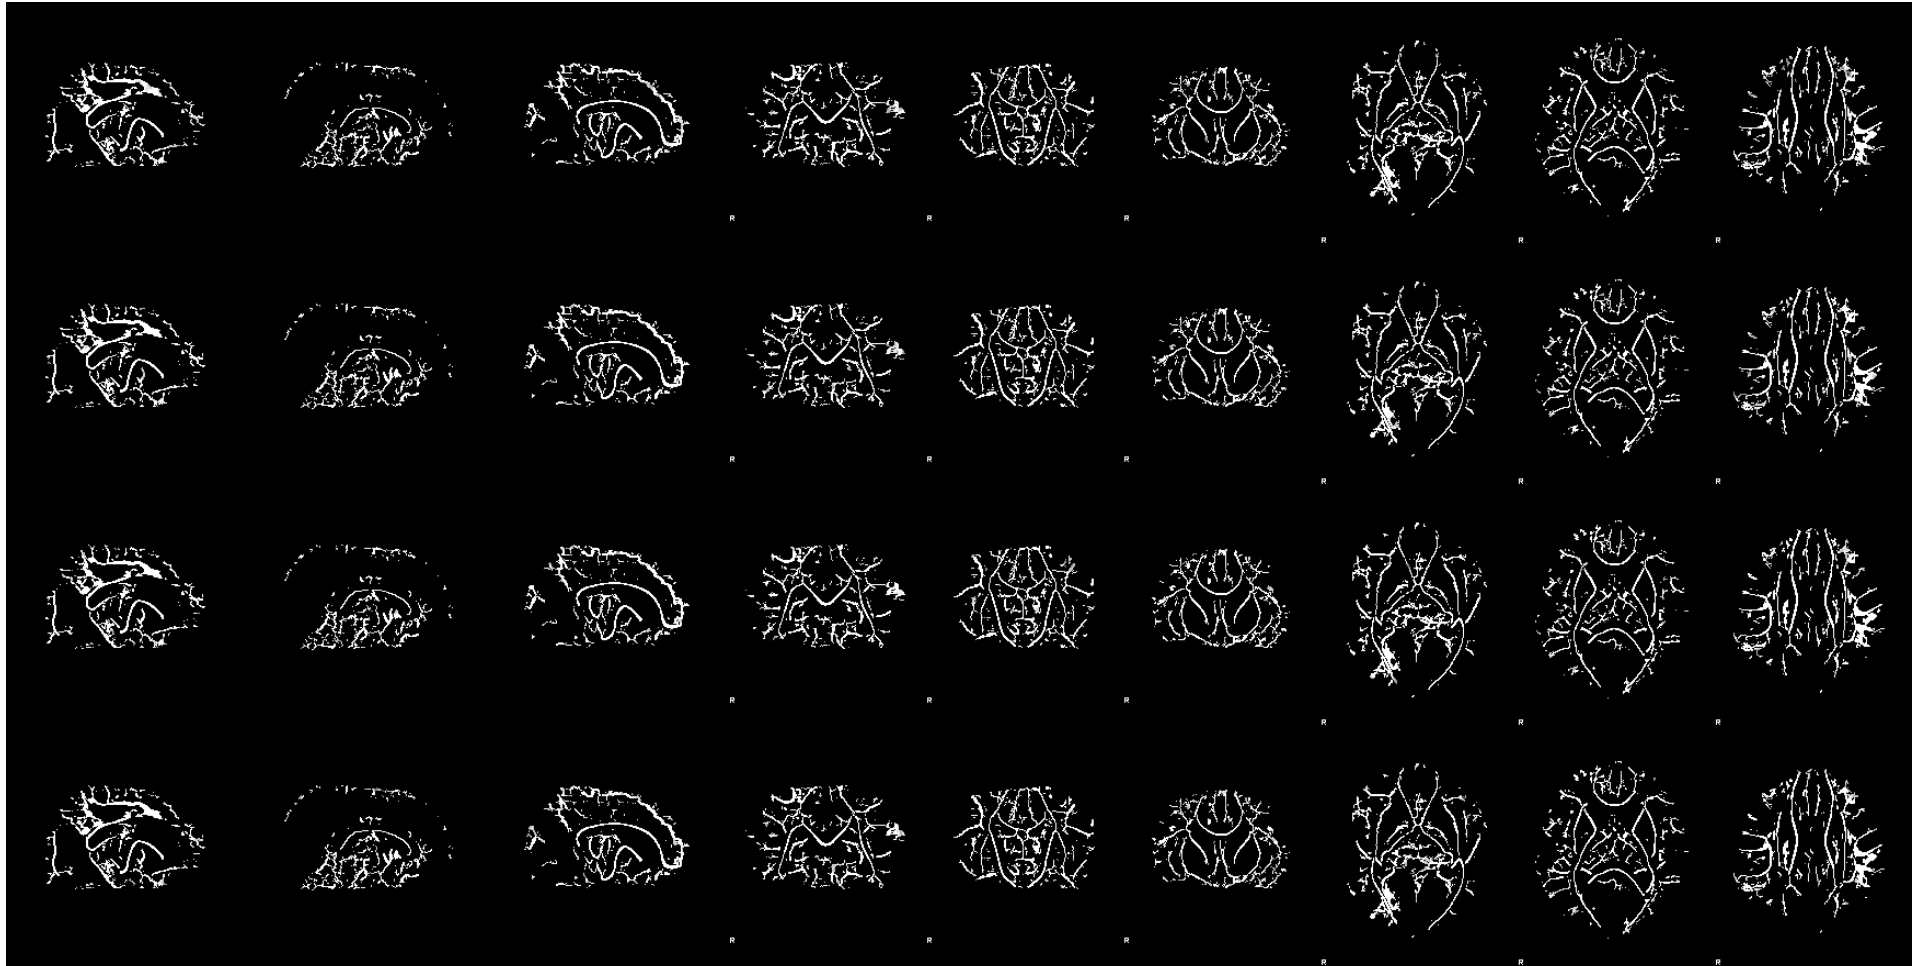

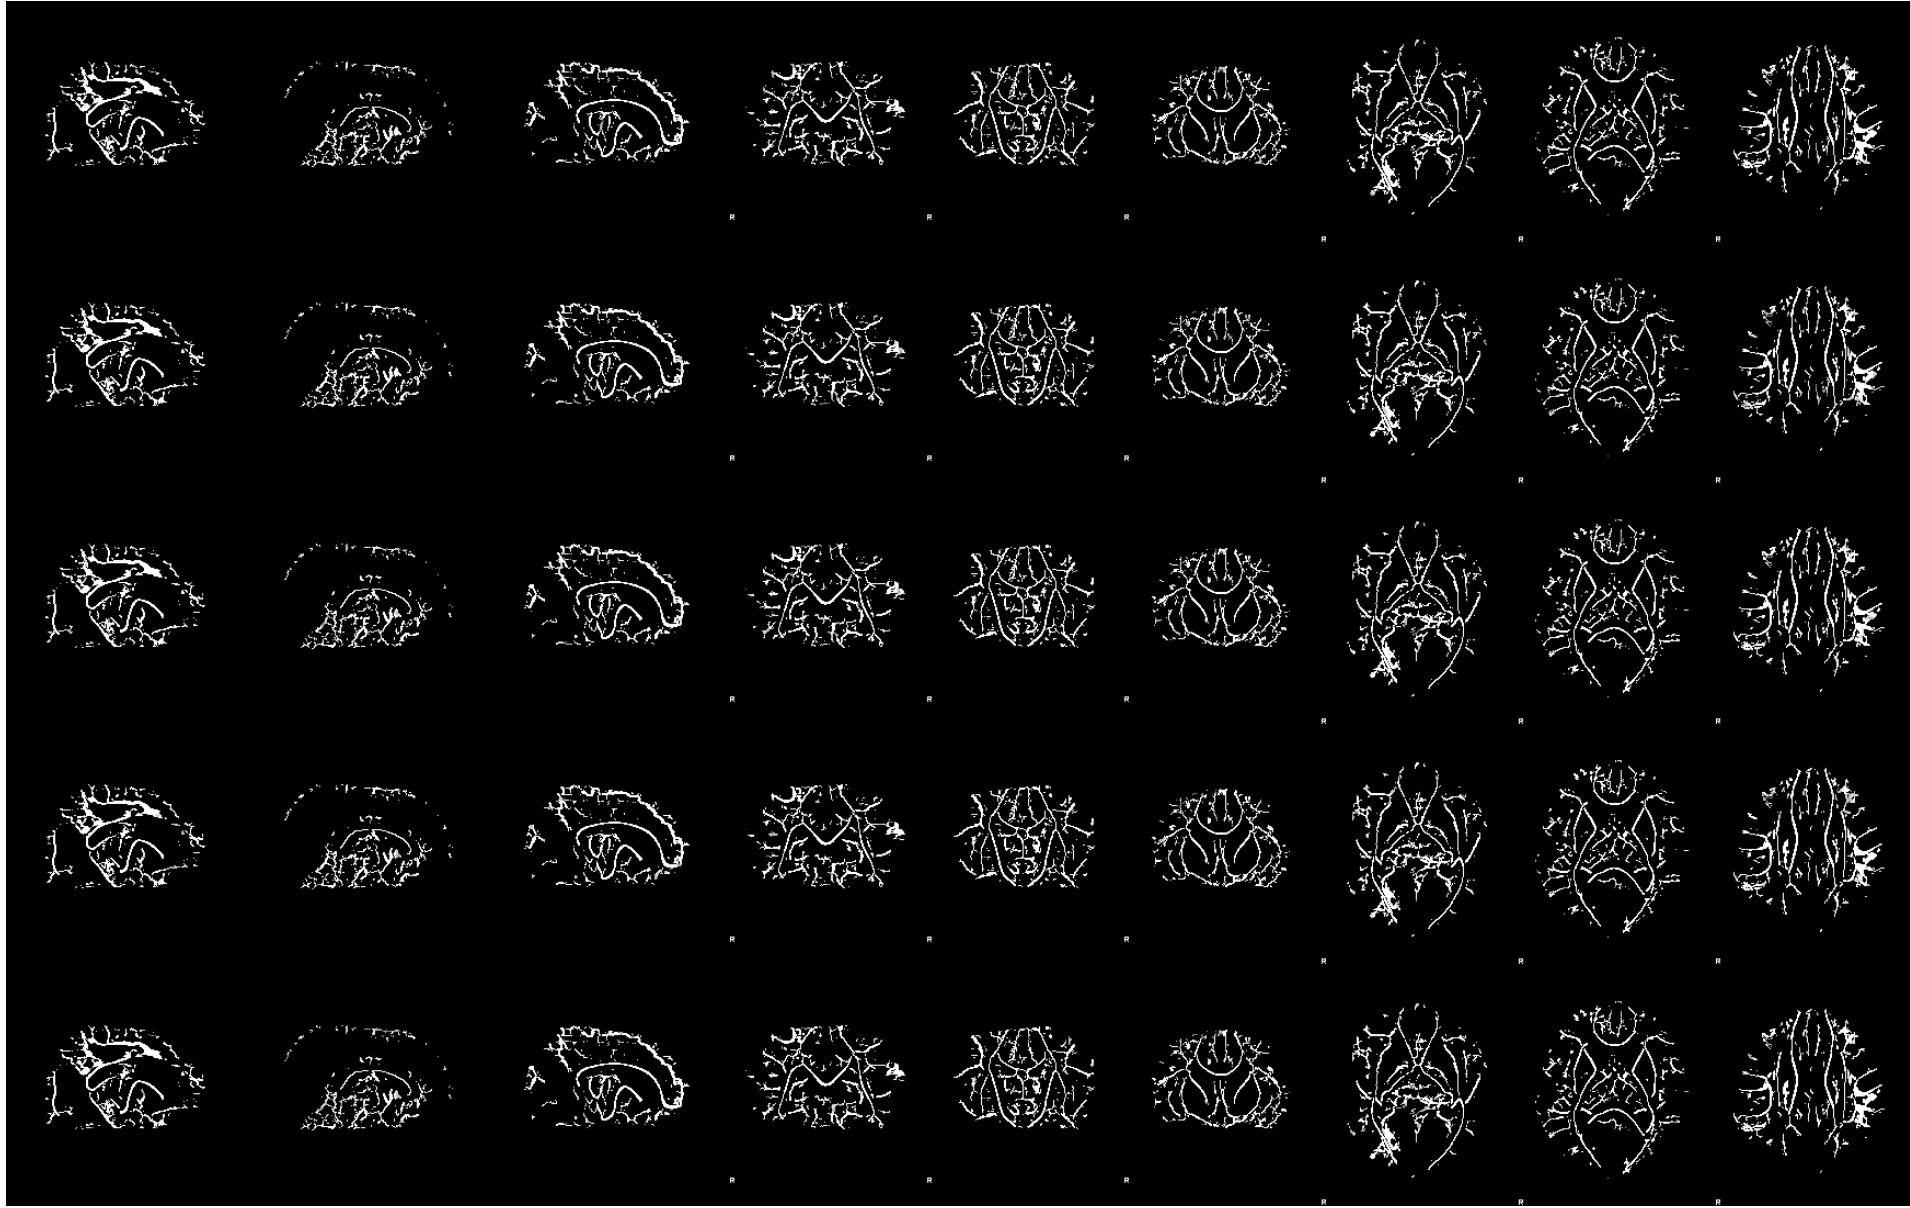

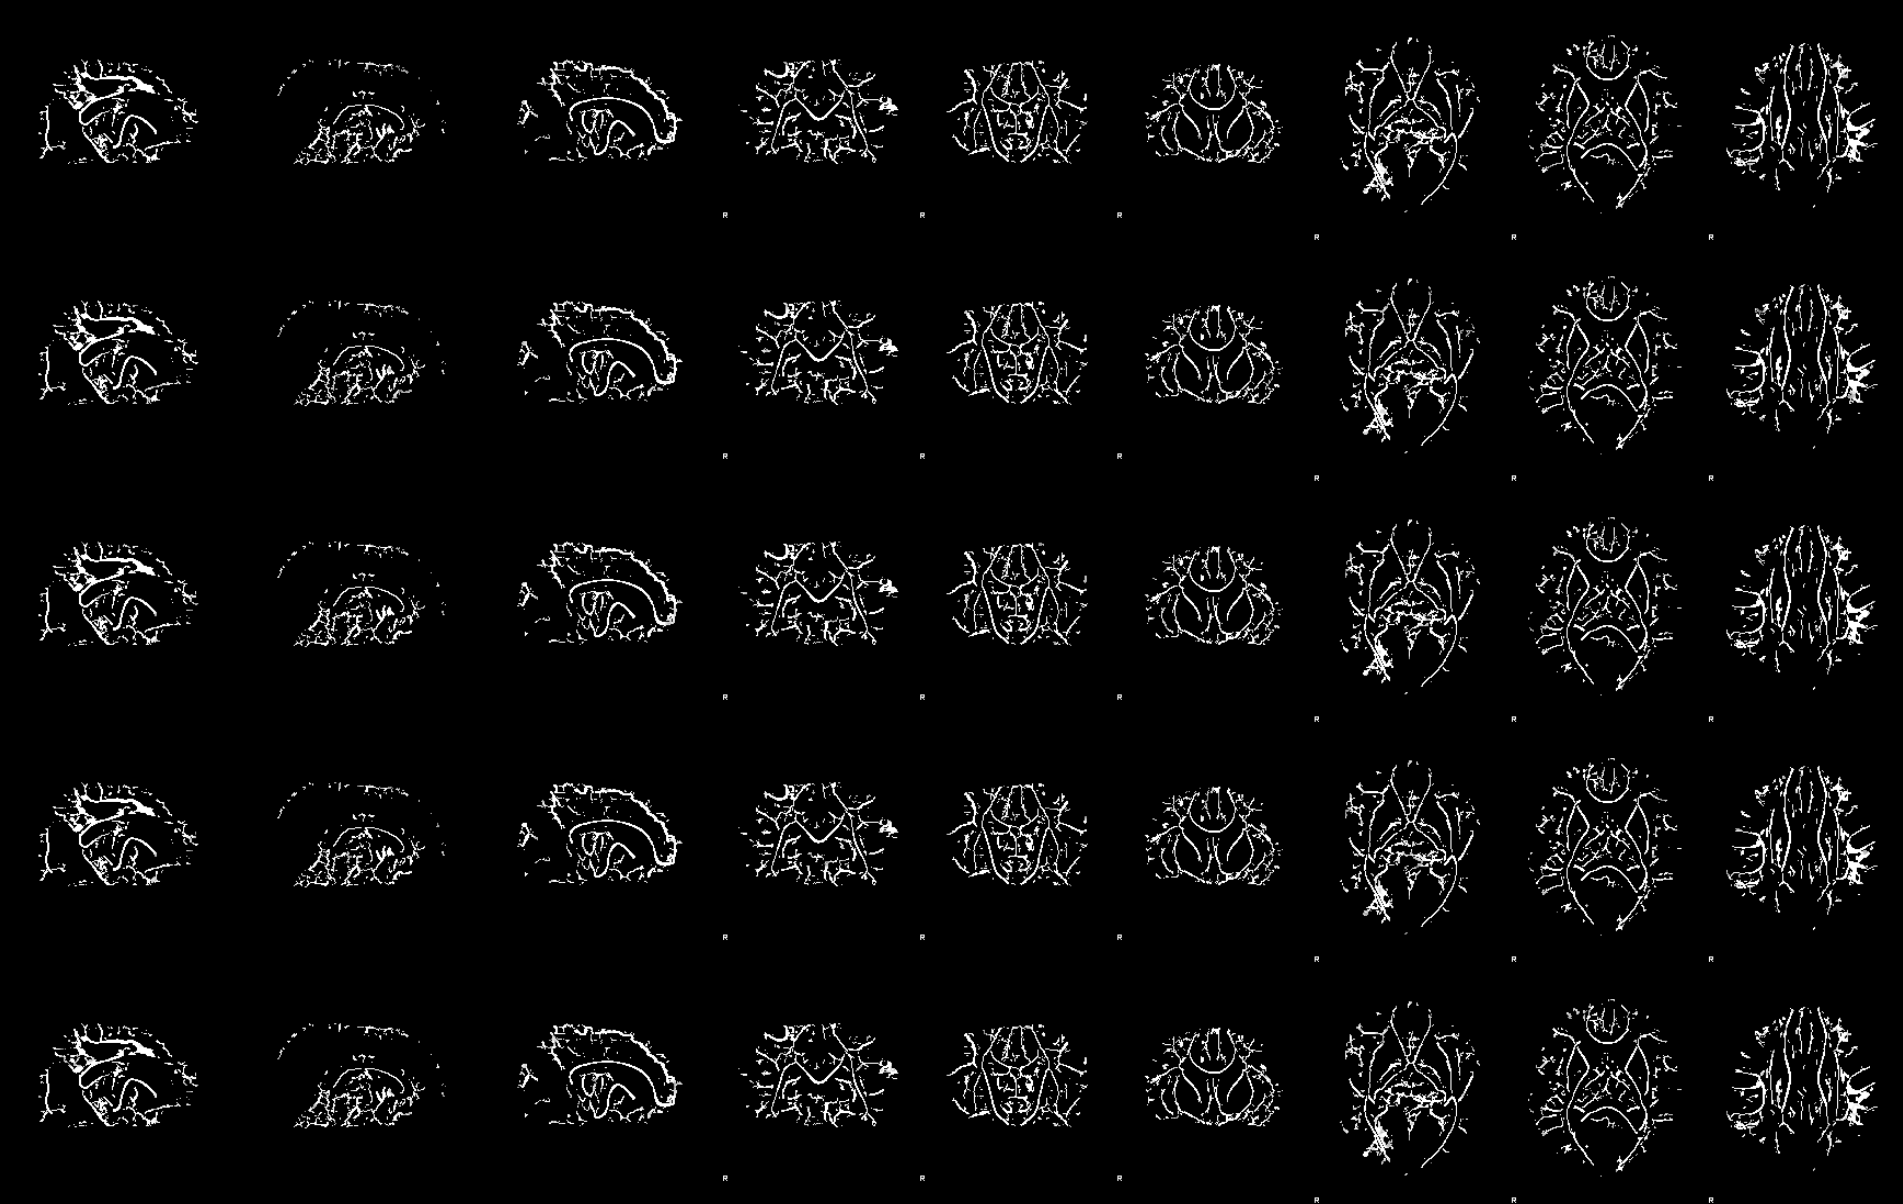

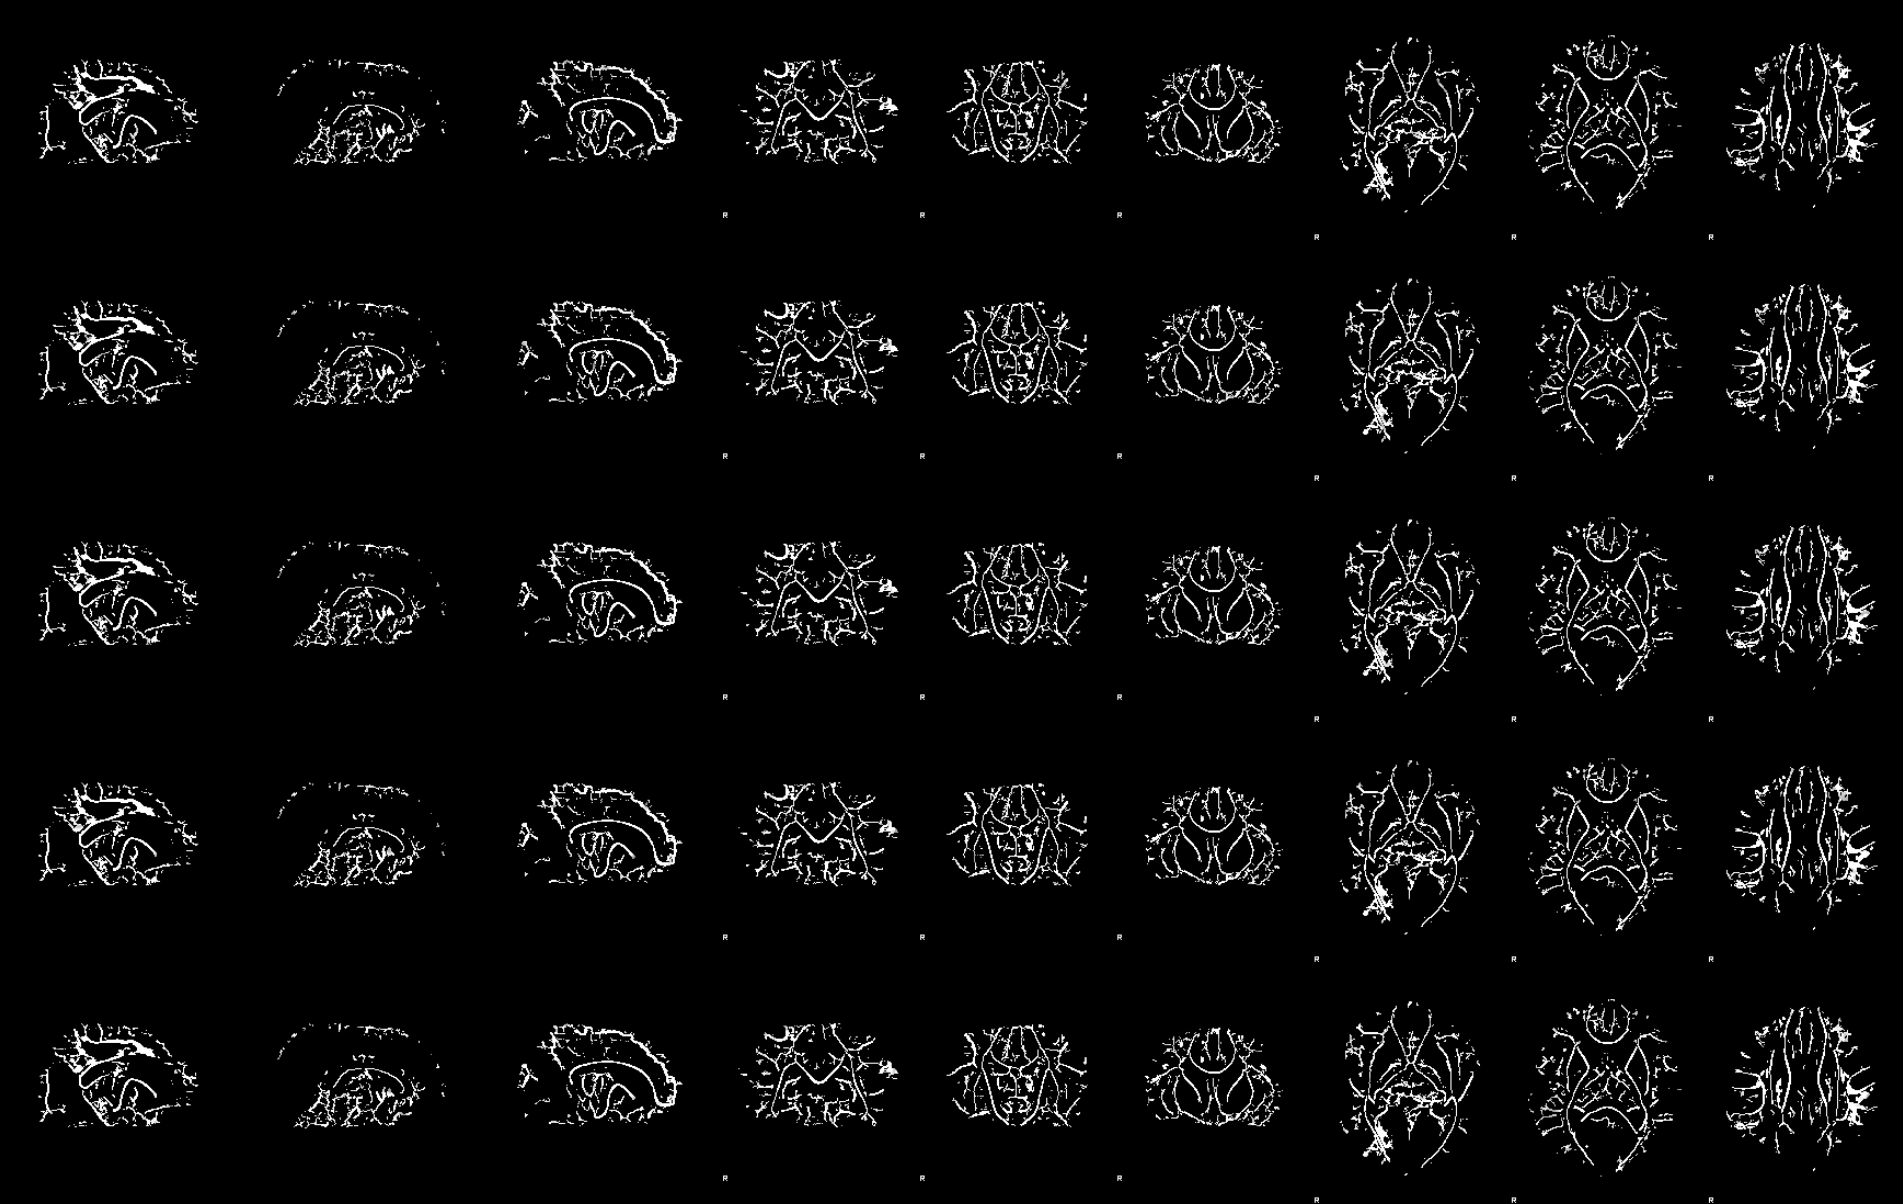

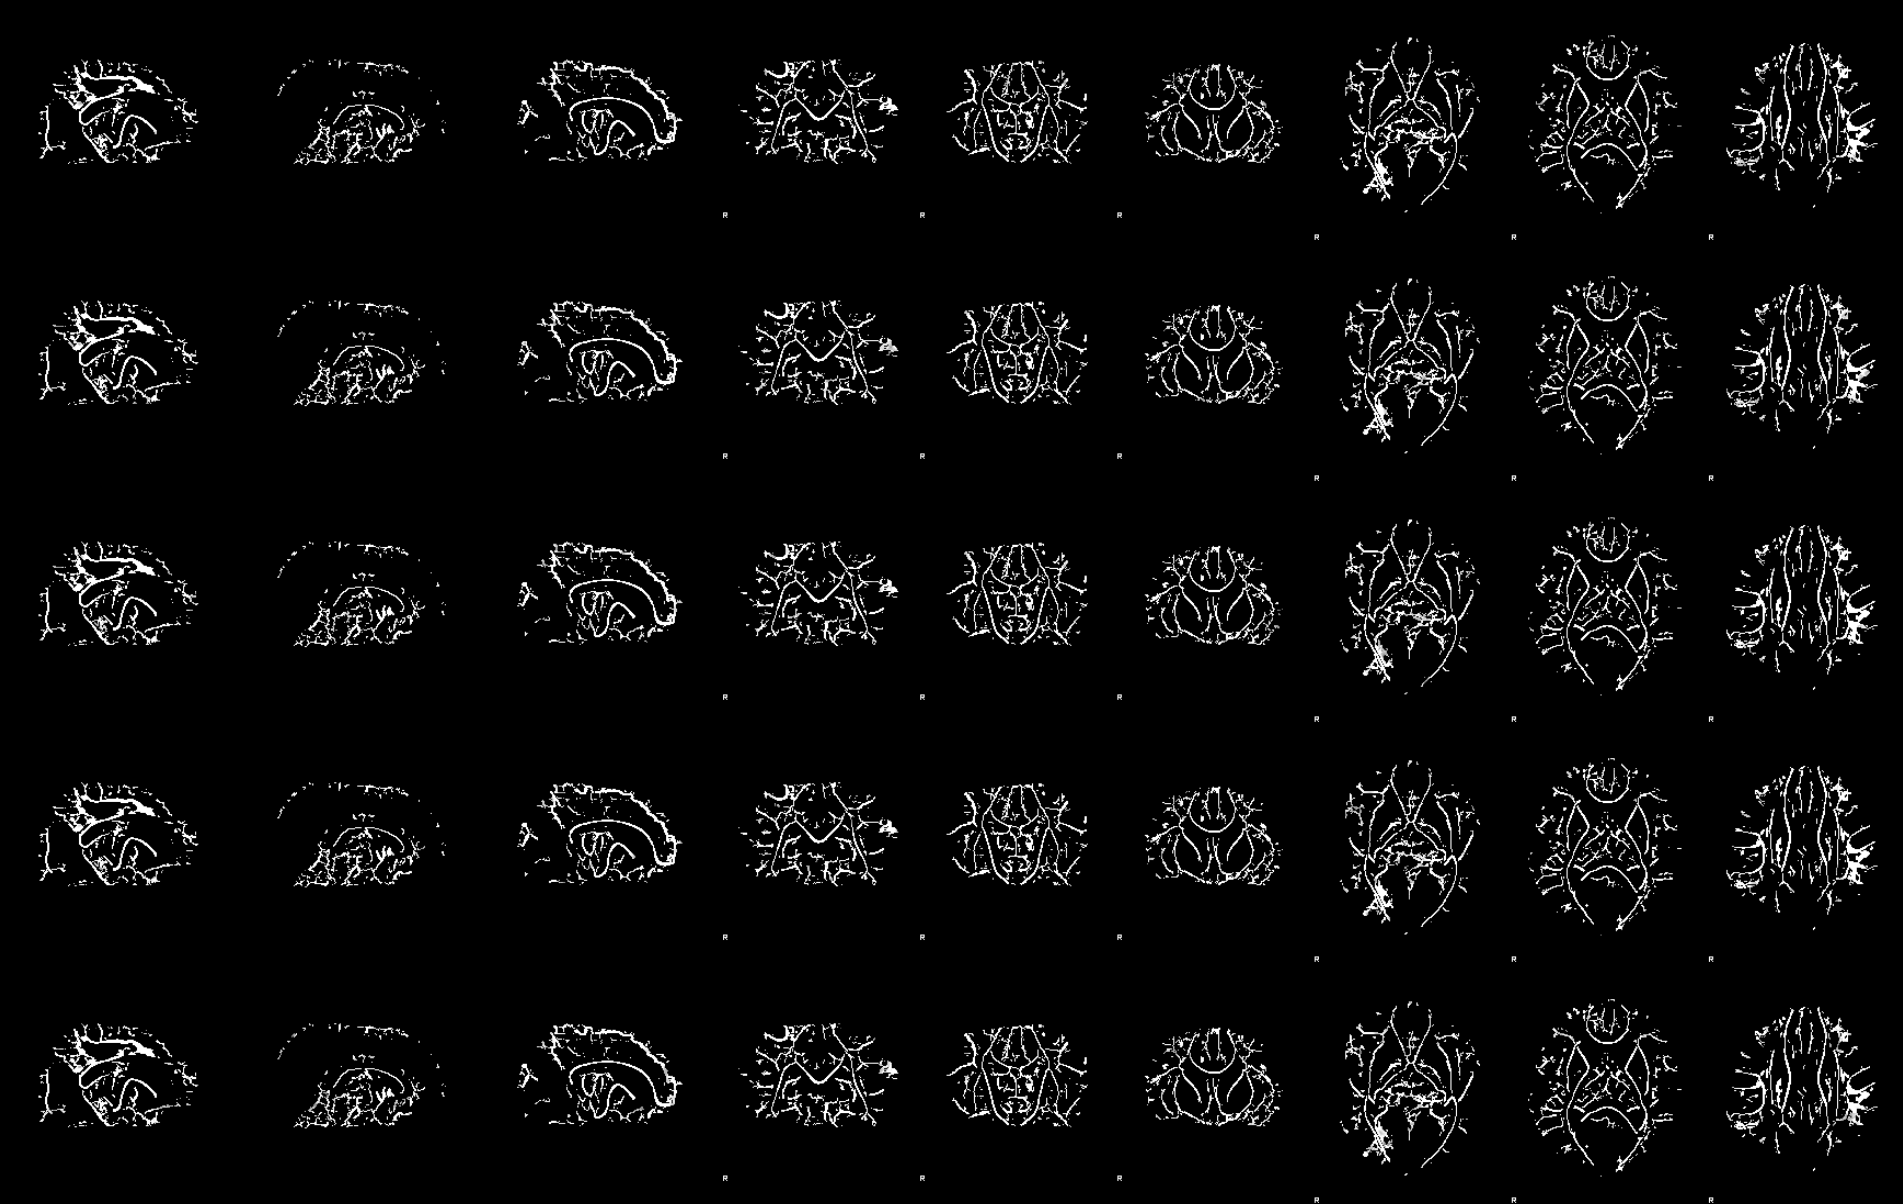



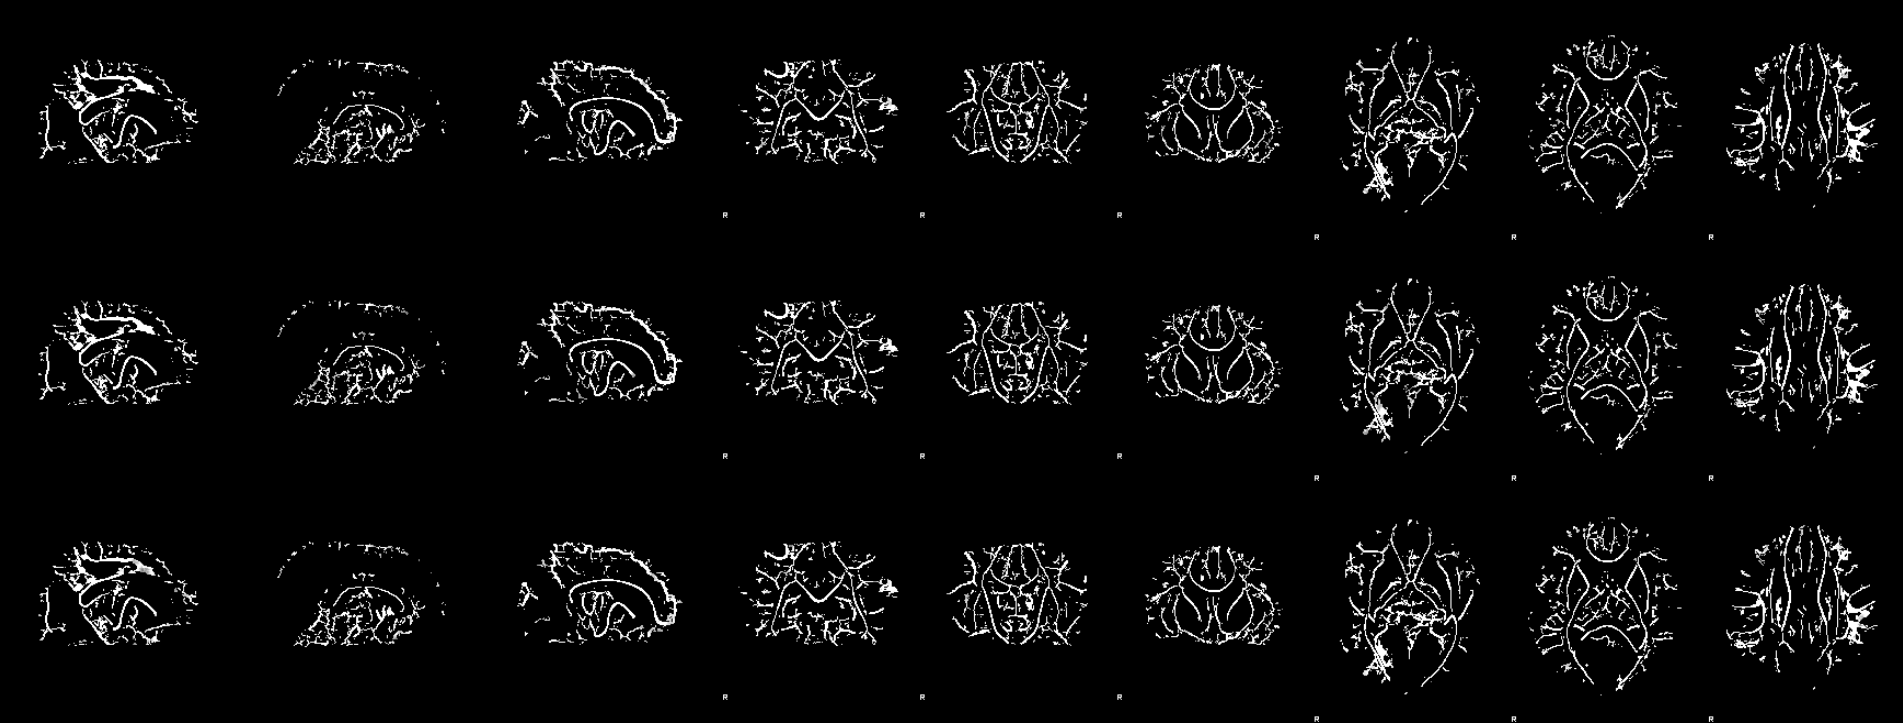

Supplement: NEU628019_supplementary_material_Registrations.pdf [file NEU628019_supplementary_material_Registrations.pdf]
