# Supplementary material
Source: PubMed Central journal article supplement (PMC4978313)
Supplement: NEU628019_supplementary_material_Patient_flow_chart.pdf [file NEU628019_supplementary_material_Patient_flow_chart.pdf]

**Perinatal MRI Diffusivity Is Related to Early Assessment of Motor Performance in Preterm Neonates - Flow Diagram**

|                        |                                                                                                                                                                                                       |
|------------------------|-------------------------------------------------------------------------------------------------------------------------------------------------------------------------------------------------------|
|                        | Enrollment Assessed for eligibility (n=38)                                                                                                                                                            |
|                        |                                                                                                                                                                                                       |
| <b>MRI Acquisition</b> | Lost to MRI Acquisition (n=6) <ul style="list-style-type: none"> <li>• Extensive white matter involvement at conventional MRI (n=4)</li> <li>• Excessive movement at DTI acquisition (n=2)</li> </ul> |
|                        |                                                                                                                                                                                                       |
| <b>Follow-Up</b>       | Lost to follow-up (n=5)                                                                                                                                                                               |
|                        |                                                                                                                                                                                                       |
| <b>Analysis</b>        | Analyzed (n=27)                                                                                                                                                                                       |
