# Supplementary material
Source: PubMed Central journal article supplement (PMC4978313)
Supplement: NEU628019_supplementary_material_Table_S1.pdf [file NEU628019_supplementary_material_Table_S1.pdf]

**Table 1s – Clinical and conventional MRI data**

| Neonate | Number of punctate lesions at conventional MRI | Weight at Birth (g) | Gestational Age at birth (week) | Age at Scan (week) | APGAR | pH  | Excess Base | Physiotherapy (h) | O2 Therapy (day) | Wight VS Gestation |
|---------|------------------------------------------------|---------------------|---------------------------------|--------------------|-------|-----|-------------|-------------------|------------------|--------------------|
| 1       | 12                                             | 1280                | 31.0                            | 9.0                | 8.0   | 7.3 | 21.0        | 88.0              | 5.0              | AGA                |
| 2       | 7                                              | 1550                | 31.3                            | 8.7                | 8.0   | 7.3 | -3.4        | 96.0              | 1.0              | AGA                |
| 3       | 0                                              | 2390                | 34.9                            | 5.1                | 1.0   | 7.0 | -11.5       | 0.0               | 4.0              | AGA                |
| 4       | 4                                              | 2870                | 32.7                            | 7.3                | 9.0   | 7.3 | -3.4        | 0.0               | 9.0              | LGA                |
| 5       | 7                                              | 1580                | 33.0                            | 7.0                | 7.0   | 7.4 | 0.7         | 96.0              | 12.0             | AGA                |
| 6       | 0                                              | 2525                | 31.0                            | 9.0                | 9.0   | 7.4 | -3.5        | 0.0               | 5.0              | LGA                |
| 7       | 3                                              | 1710                | 33.6                            | 6.4                | 9.0   | 7.3 | -5.6        | 0.0               | 3.0              | AGA                |
| 8       | 0                                              | 1840                | 33.6                            | 6.4                | 7.0   | 7.3 | -6.3        | 0.0               | 6.0              | AGA                |
| 9       | 0                                              | 2140                | 34.0                            | 6.0                | 7.0   | 7.4 | -2.1        | 0.0               | 3.0              | AGA                |
| 10      | 0                                              | 1680                | 34.0                            | 6.0                | 8.0   | 7.3 | -5.0        | 0.0               | 0.0              | AGA                |
| 11      | 0                                              | 1440                | 34.0                            | 6.0                | 8.0   | 7.3 | -2.9        | 0.0               | 0.0              | SGA                |
| 12      | 0                                              | 1890                | 34.0                            | 6.0                | 9.0   | 7.3 | -4.2        | 0.0               | 3.0              | AGA                |
| 13      | 0                                              | 1910                | 34.0                            | 6.0                | 8.0   | 7.2 | -5.7        | 0.0               | 2.0              | AGA                |
| 14      | 0                                              | 1780                | 34.0                            | 6.0                | 8.0   | 7.1 | -4.3        | 0.0               | 0.0              | AGA                |
| 15      | 0                                              | 2780                | 35.0                            | 5.0                | 5.0   | 7.3 | -5.0        | 0.0               | 8.0              | AGA                |
| 16      | 0                                              | 1520                | 30.1                            | 9.9                | 7.0   | 7.4 | -4.4        | 0.0               | 9.0              | AGA                |
| 17      | 0                                              | 1510                | 34.0                            | 6.0                | 7.0   | 7.4 | -4.4        | 192.0             | 7.0              | AGA                |
| 18      | 2                                              | 2350                | 34.0                            | 6.0                | 8.0   | 7.4 | -4.8        | 0.0               | 2.0              | AGA                |
| 19      | 0                                              | 2330                | 35.1                            | 4.9                | 7.0   | 7.3 | -1.1        | 0.0               | 8.0              | AGA                |
| 20      | 13                                             | 1945                | 32.9                            | 7.1                | 5.0   | 7.4 | -5.0        | 32.0              | 2.0              | AGA                |
| 21      | 0                                              | 1635                | 32.9                            | 7.1                | 5.0   | 7.3 | -6.0        | 32.0              | 1.0              | AGA                |
| 22      | 0                                              | 1360                | 31.1                            | 8.9                | 6.0   | 7.4 | -2.7        | 0.0               | 5.0              | AGA                |
| 23      | 9                                              | 1890                | 31.6                            | 8.4                | 7.0   | 7.4 | -6.5        | 36.0              | 2.0              | AGA                |
| 24      | 6                                              | 1750                | 31.6                            | 8.4                | 7.0   | 7.4 | -4.5        | 36.0              | 2.0              | AGA                |
| 25      | 0                                              | 1920                | 30.0                            | 10.0               | 5.0   | 7.5 | -6.0        | 144.0             | 6.0              | LGA                |
| 26      | 1                                              | 1450                | 35.0                            | 5.0                | 7.0   | 7.1 | -18.8       | 144.0             | 5.0              | SGA                |
| 27      | 0                                              | 1640                | 30.0                            | 10.0               | 8.0   | 7.4 | -5.0        | 0.0               | 3.0              | LGA                |

|          |    |      |      |      |     |     |       |       |      |
|----------|----|------|------|------|-----|-----|-------|-------|------|
| mean     | 2  | 1876 | 32.9 | 7.1  | 7.0 | 7.3 | -4.1  | 33.2  | 4.2  |
| mode     | 0  | 1890 | 34.0 | 6.0  | 7.0 | 7.4 | -5.0  | 0.0   | 2.0  |
| median   | 0  | 1780 | 33.6 | 6.4  | 7.0 | 7.3 | -4.5  | 0.0   | 3.0  |
| st. dev. | 4  | 423  | 1.6  | 1.6  | 1.7 | 0.1 | 6.1   | 55.3  | 3.1  |
| min      | 0  | 1280 | 30.0 | 4.9  | 1.0 | 7.0 | -18.8 | 0.0   | 0.0  |
| max      | 13 | 2870 | 35.1 | 10.0 | 9.0 | 7.5 | 21.0  | 192.0 | 12.0 |
| range    | 13 | 1590 | 5.1  | 5.1  | 8.0 | 0.4 | 39.8  | 192.0 | 12.0 |
