# Supplementary material
Source: PubMed Central journal article supplement (PMC4978313)
Supplement: NEU628019_supplementary_material_Table_S2.pdf [file NEU628019_supplementary_material_Table_S2.pdf]

**Table 2s – FA, AD, MD and RD values of the right and left PLIC and CST<sup>(a)</sup>**

|               | Mean  | Range | Minimum | Maximum | Std. Deviation |
|---------------|-------|-------|---------|---------|----------------|
| FA CST Left   | .358  | .088  | .312    | .400    | .023           |
| FA CST Right  | .361  | .101  | .317    | .418    | .027           |
| FA PLIC Left  | .487  | .162  | .384    | .546    | .032           |
| FA PLIC Right | .497  | .153  | .426    | .579    | .038           |
| AD CST Left   | 1.690 | .227  | 1.589   | 1.816   | .063           |
| AD CST Right  | 1.699 | .253  | 1.575   | 1.828   | .075           |
| AD PLIC Left  | 1.680 | .196  | 1.586   | 1.782   | .061           |
| AD PLIC Right | 1.712 | .250  | 1.586   | 1.836   | .071           |
| MD CST Left   | 1.207 | .254  | 1.094   | 1.348   | .061           |
| MD CST Right  | 1.209 | .274  | 1.098   | 1.372   | .068           |
| MD PLIC Left  | 1.049 | .182  | .952    | 1.134   | .047           |
| MD PLIC Right | 1.058 | .203  | .978    | 1.181   | .048           |
| RD CST Left   | .966  | .268  | .846    | 1.114   | .064           |
| RD CST Right  | .964  | .304  | .840    | 1.144   | .070           |
| RD PLIC Left  | .734  | .217  | .627    | .844    | .053           |
| RD PLIC Right | .731  | .223  | .636    | .859    | .056           |

<sup>(a)</sup>Anisotropy is unit-less. Diffusion index unit measure:  $10^{-3}$  mm<sup>2</sup>/s
